# Supplementary material
Source: MDPI journal article supplement (https://www.mdpi.com/2073-4344/9/1/51)
Supplement: s1 [file s1]

# Supporting Information

## 1. CO<sub>2</sub>, CH<sub>4</sub> AND TOTAL CONVERSION

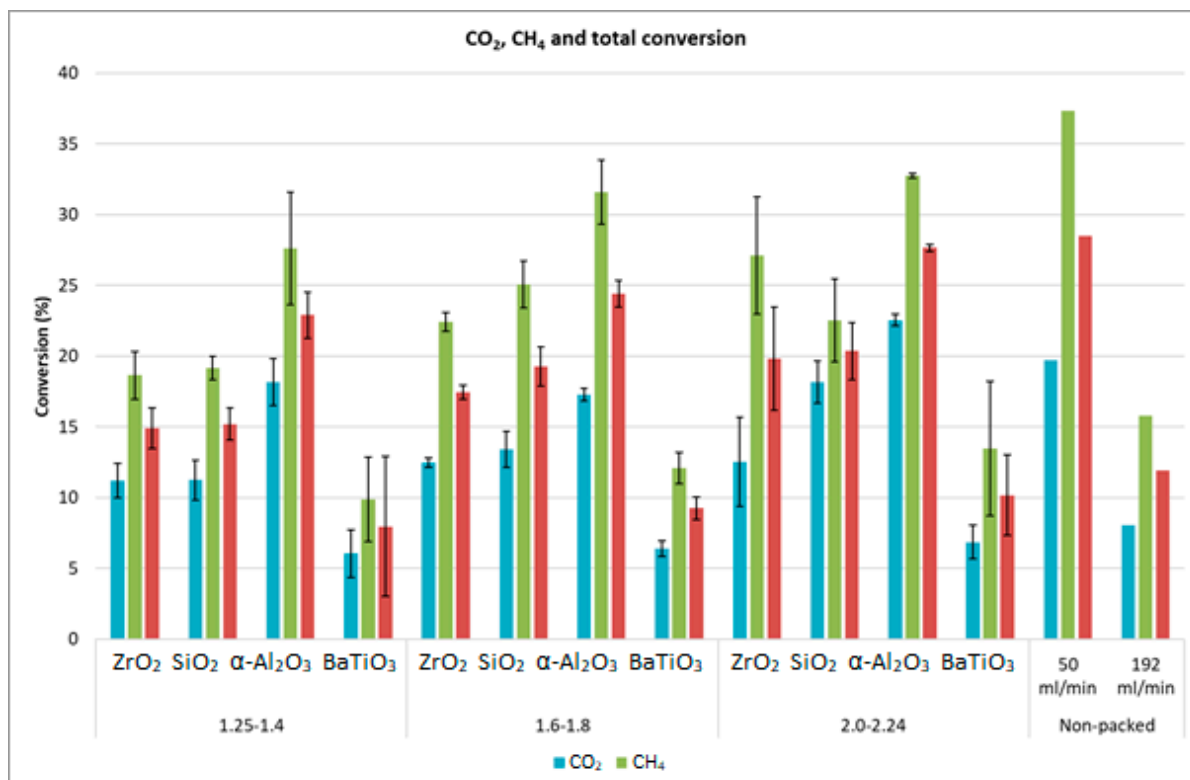

Figure S.1: CO<sub>2</sub>, CH<sub>4</sub> and total conversion for different sphere sizes and materials, compared to the results for the non-packed reactor, at the same flow rate (50 ml/min) and at the same residence time (5,52 s; flow rate of 192 ml/min).

## 2. ELECTRICAL AND MATERIAL CHARACTERISATION

Table S.1: Physical and chemical characteristics of the packing materials

|                                                                   | BaTiO <sub>3</sub> | ZrO <sub>2</sub> | SiO <sub>2</sub> | $\alpha$ -Al <sub>2</sub> O <sub>3</sub> | $\gamma$ -Al <sub>2</sub> O <sub>3</sub> |
|-------------------------------------------------------------------|--------------------|------------------|------------------|------------------------------------------|------------------------------------------|
| Molar mass (g/mol)                                                | 233.20             | 123.22           | 60.08            | 101.96                                   | 101.96                                   |
| Density (g/cm <sup>3</sup> )                                      | 6.02               | 5.70             | 2.20             | 3.89                                     | 3.65                                     |
| Thermal conductivity (W/m.K) <sup>a</sup>                         | 2.85               | 1.70             | 1.38             | 28.0 - 35.0                              | 28.0 - 35.0                              |
| Thermal expansion coefficient (10 <sup>-6</sup> /°C) <sup>a</sup> | 11.4               | 12.2             | 0.550            | 5.8-8                                    | 5.8-8                                    |
| Specific heat capacity (J/(g.K)) <sup>b</sup>                     | 0.406              | 0.456            | 0.99             | 0.798                                    | 0.850                                    |
| Band gap (eV) <sup>c</sup>                                        | 3.2                | 4.2              | 8.9              | 7.0                                      | 8.7                                      |
| Dielectric strength (10 <sup>6</sup> V/m) <sup>a</sup>            | >30.0              | 5                | 32.5             | 8                                        | 8                                        |
| Dielectric constant <sup>a</sup>                                  | 4000               | 23.0             | 3.9              | 9.00                                     | 9.00                                     |
| Molar heat (J/(mol.K)) <sup>a</sup>                               | 94.68              | 56.23            | 59.64            | 81.38                                    | 108.7                                    |
| BET specific surface (m <sup>2</sup> /g) <sup>d</sup>             | 0.8                | 0                | 0.5              | 0.08                                     | 336                                      |

|                                                          |         |         |         |         |         |
|----------------------------------------------------------|---------|---------|---------|---------|---------|
| Total open pore volume (mm <sup>3</sup> /g) <sup>e</sup> | 158.0   | ≈0      | ≈0      | 8.47    | 500     |
| Pore size (μm) <sup>e</sup>                              | 0.87    | ≈0      | ≈0      | 0.080   | 0.54    |
| Surface roughness (nm) <sup>f</sup>                      | 590±15  | 84±1    | 82±3    | 150±4   | /       |
| Plasma power (Watt) <sup>g</sup>                         | 65±2    | 62±3    | 64±1    | 58±2    | 60±0    |
| Burning voltage (kV) <sup>g</sup>                        | 2.2±0.1 | 2.5±0.2 | 2.8±0.1 | 2.9±0.2 | 2.9±0.1 |

a: Taken from [1–10]

b: Calculated from the molar heat and the molar mass

c: Obtained from UV-vis DR spectra, for milled spheres (Figure S.2, Figure S.3 and Figure S.4)

d: Obtained from nitrogen sorption (Figure S.5 - Figure S.9)

e: Obtained from Hg-porosimetry, for 1.6-1.8 mm spheres (Figure S.10- Figure S.14)

f: Obtained from profilometry, for 2.0-2.24 mm spheres in collaboration with ULB [11]

g: Obtained by analysing the Lissajous-data (averaged out on the different sphere sizes)

**Table S.2: Electrical characterisation for all experiments**

| Conditions                       |               | Plasma Power (W) | U <sub>bur</sub> (kV) | U <sub>pp</sub> (kV) | Average charge per filament (nC) | Number of discharges | I <sub>RMS</sub> (mA) |
|----------------------------------|---------------|------------------|-----------------------|----------------------|----------------------------------|----------------------|-----------------------|
| Non-packed reactor               | 50 ml/min     | 62.86            | 3.861                 | 15.09                | 16834                            | 20.05                | 28.11                 |
|                                  | 192 ml/min    | 62.33            | 4.168                 | 15.08                | 14243                            | 24.93                | 27.68                 |
| SiO <sub>2</sub>                 | 1.25 - 1.4 mm | 61.87            | 2.690                 | 13.19                | 21534                            | 85.97                | 36.03                 |
|                                  | 1.6 - 1.8 mm  | 62.38            | 2.797                 | 12.56                | 5020                             | 92.10                | 36.26                 |
|                                  | 2.0 - 2.24 mm | 65.16            | 2.945                 | 12.46                | 4331                             | 114.67               | 36.14                 |
| ZrO <sub>2</sub>                 | 1.25 - 1.4 mm | 61.87            | 2.690                 | 13.19                | 5397                             | 85.97                | 36.03                 |
|                                  | 1.6 - 1.8 mm  | 63.53            | 2.344                 | 12.64                | 4618                             | 128.65               | 45.18                 |
|                                  | 2.0 - 2.24 mm | 62.95            | 2.498                 | 12.04                | 3610                             | 155.46               | 43.05                 |
| α-Al <sub>2</sub> O <sub>3</sub> | 1.25 - 1.4 mm | 55.22            | 2.787                 | 17.16                | 3214                             | 131.31               | 35.28                 |
|                                  | 1.6 - 1.8 mm  | 59.87            | 2.772                 | 16.81                | 4182                             | 112.25               | 37.15                 |
|                                  | 2.0 - 2.24 mm | 59.18            | 3.076                 | 16.75                | 2918                             | 131.27               | 34.16                 |
| γ-Al <sub>2</sub> O <sub>3</sub> | -             |                  |                       |                      |                                  |                      |                       |
|                                  | -             |                  |                       |                      |                                  |                      |                       |
|                                  | 2.0 - 2.24 mm | 59.99            | 2.861                 | 14.353               | 3469                             | 146.58               | 36.98                 |
| BaTiO <sub>3</sub>               | 1.25 - 1.4 mm | 63.96            | 2.077                 | 11.541               | 5365                             | 132.67               | 50.77                 |
|                                  | 1.6 - 1.8 mm  | 65.28            | 2.187                 | 11.576               | 5300                             | 135.91               | 49.95                 |
|                                  | 2.0 - 2.24 mm | 66.94            | 2.240                 | 11.266               | 5240                             | 131.00               | 49.98                 |

Table S.1 summarises a non-limitative list of possible influencing material characteristics, based on measured data (e.g. UV-DR, N<sub>2</sub>-sorption and Hg-porosimetry) and literature values. In the rest of section 1, the graphs of the measured data can be found.

The material characteristics of the different packing materials will influence the results obtained in this work, i.e. both conversion and product fractions/selectivities. Even though we cannot yet identify which material properties are responsible for the differences in the plasma chemistry, we have measured those properties, from which we expect a possible influence on the results. Therefore, all packing materials are studied with UV-DR (photon absorption, band gap), profilometry (surface roughness), nitrogen sorption (micro- and mesoporosity, surface area), Hg-porosimetry (meso- and macroporosity), SEM-EDX (chemical composition) and TGA (e.g. thermal stability and presence of surface adsorbed species). The specifics of the equipment are listed in Table S.3.

**Table S.3: Specifics of the equipment for all characterization techniques**

|                          |                                                                                                                                                                                                  |
|--------------------------|--------------------------------------------------------------------------------------------------------------------------------------------------------------------------------------------------|
| UV-DR                    | Thermo-electron evolution 500 UV-VIS spectrometer, using a Thermo-electron RSA UC40 Diffuse Reflectance cell. The samples were crushed, and the powder was diluted (2 wt% sample in 98 wt% KBr). |
| Profilometry             | Brücker Dektak XT stylus profiler (measured at ULB)                                                                                                                                              |
| N <sub>2</sub> -sorption | Quantachrome Autosorb Degasser and Quantachrome Quadrasorb SI. Degassing took place during 16 hours, at 150 °C, and 2x10 <sup>-5</sup> bar                                                       |
| Hg-porosimetry           | Mercure Intrusion Porosimetry (Pascal 140, Thermo Scientific, USA) (measured at VITO)                                                                                                            |
| TGA                      | Mettler Toledo TGA/SDTA851, O <sub>2</sub> -flow, 30-800 °C, 10 K/min                                                                                                                            |
| SEM EDX                  | Quanta 250 FEG ESEM (high-vacuum)                                                                                                                                                                |

## 2.1 UV-DR

By comparing the UV-DR spectrum (Figure S.2) before and after plasma exposure, we can see that there is no significant change in the intersection of the tangent of the Tauc plot with the x-axis. The band-gap of the material thus remains unaltered after plasma exposure. The band gap of the tested SiO<sub>2</sub> spheres was calculated as 3.4 eV, which is lower than the band gap for amorphous SiO<sub>2</sub> (9.2 eV). The SiO<sub>2</sub> spheres are assumed to be glass, containing mostly Na, Ca, Mg. This is confirmed by the analysis with SEM-EDX (Table S.4).

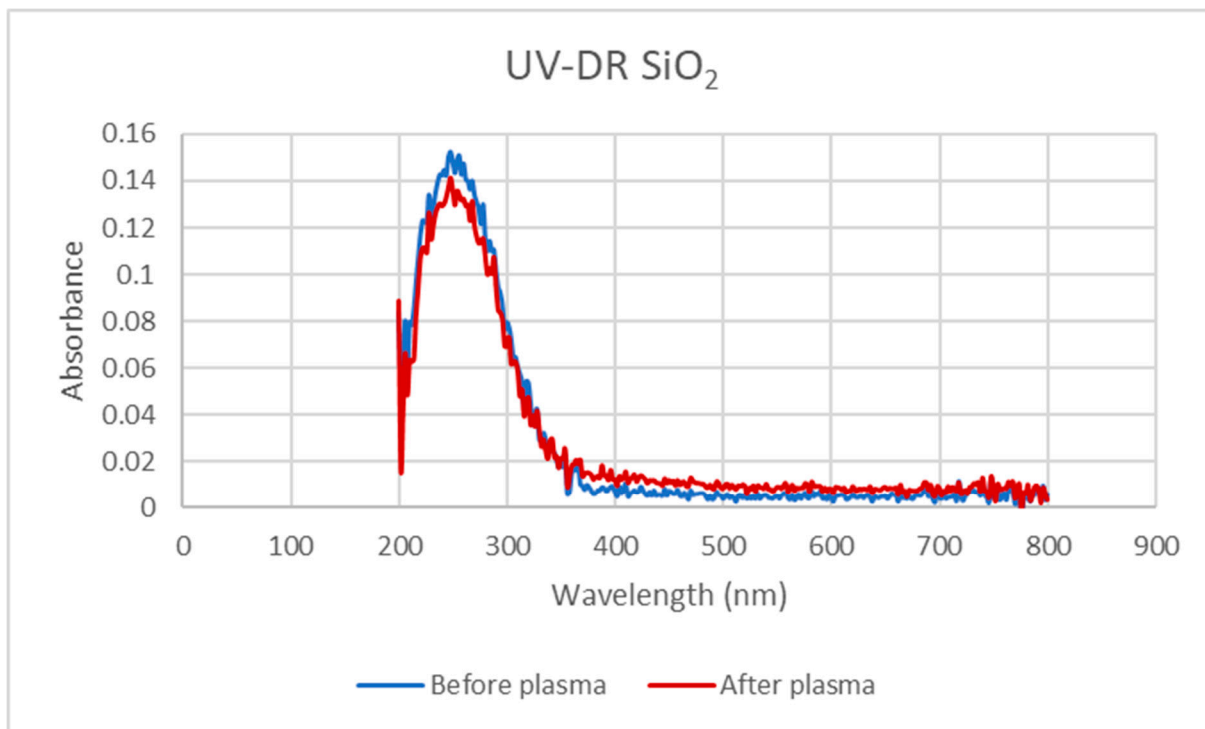

**Figure S.2: UV-DR spectra of SiO<sub>2</sub> before (blue graph) and after (red graph) plasma exposure (milled spheres)**

The UV-DR spectrum of ZrO<sub>2</sub> (Figure S.3) shows a bandgap of 4.3 eV, which remains unaltered after plasma exposure.

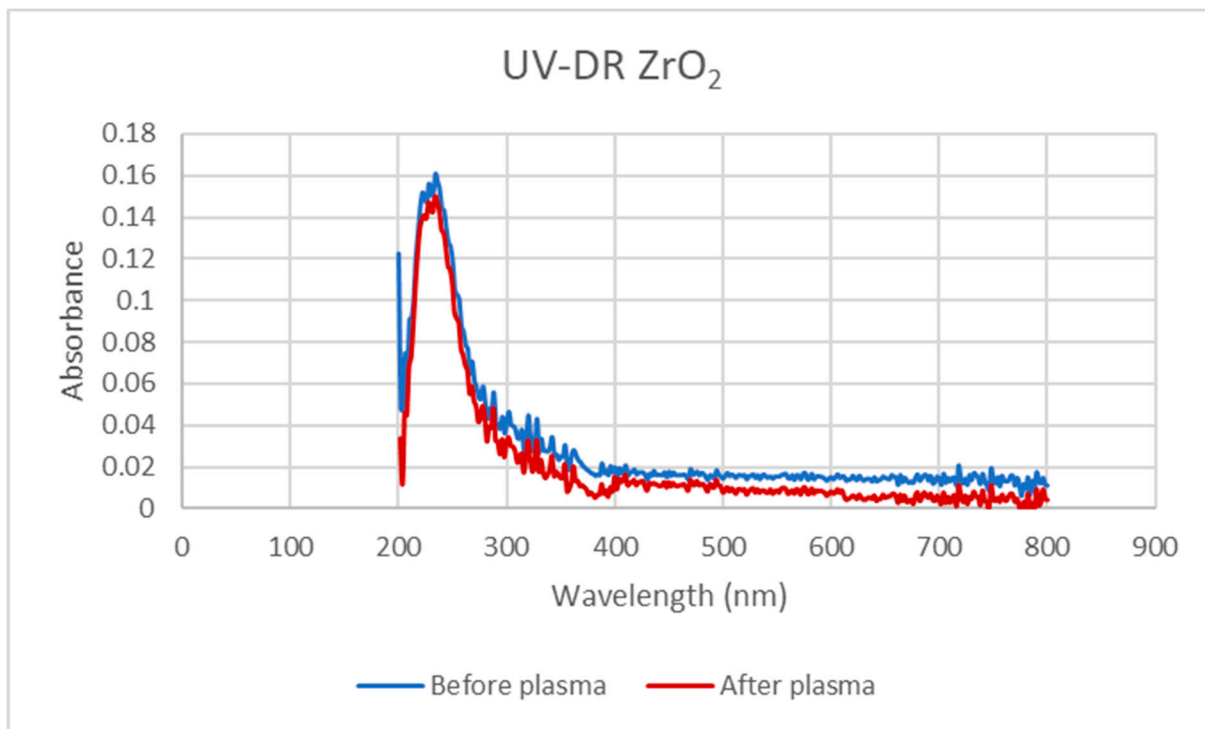

**Figure S.3: UV-DR spectra for ZrO<sub>2</sub> before (blue graph) and after (red graph) plasma exposure (milled spheres)**

$\alpha$ -Al<sub>2</sub>O<sub>3</sub> is not active in UV-DR.

The UV-DR spectra (Figure S.4) for the BaTiO<sub>3</sub> spheres before and after plasma lead to the same band gap: 2,98 eV; the band-gap of the material thus remains unaltered after plasma exposure. The literature gives a value of 3.2 eV for tetragonal BaTiO<sub>3</sub>[12]. At the moment we cannot explain this discrepancy in values, but it might be dependent on the crystal phase and/or structural composition[13,14].

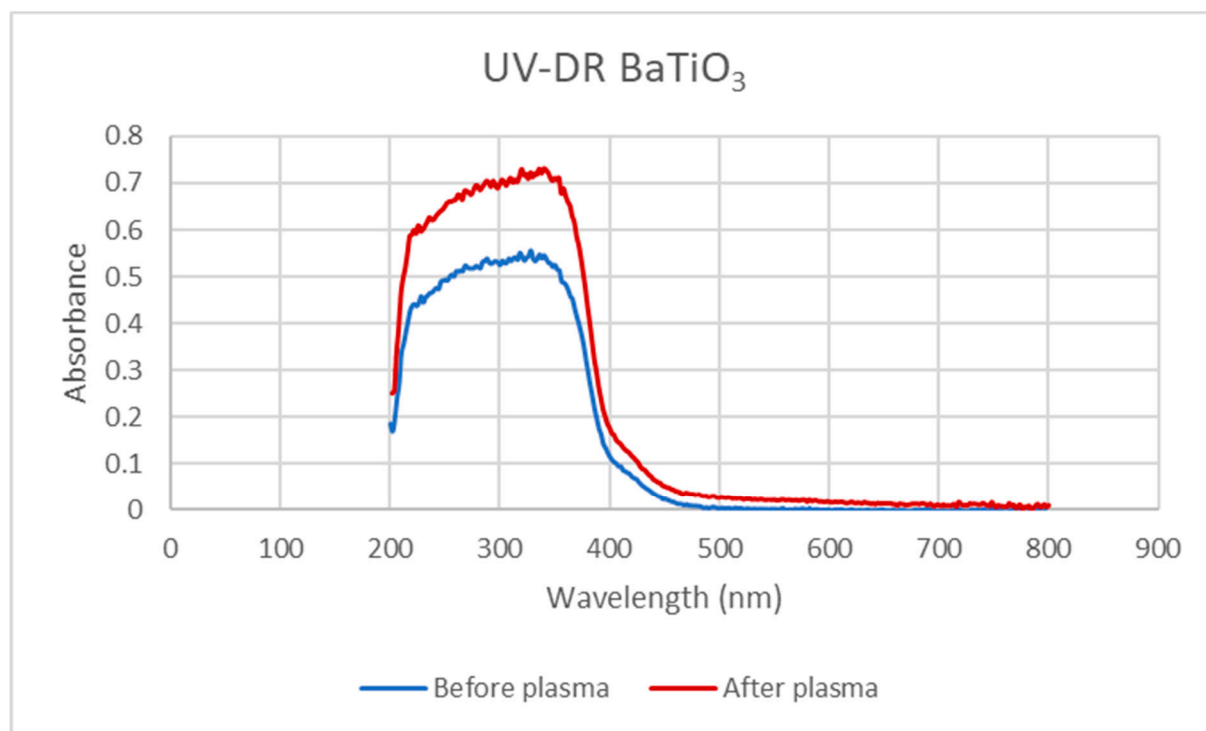

Figure S.4: UV-DR spectra for BaTiO<sub>3</sub> before (blue graph) and after (red graph) plasma exposure (milled spheres)

## 2.2 N<sub>2</sub>-sorption

The nitrogen-sorption isotherms, used to calculate the apparent surface area of the SiO<sub>2</sub>, ZrO<sub>2</sub>,  $\alpha$ -Al<sub>2</sub>O<sub>3</sub>,  $\gamma$ -Al<sub>2</sub>O<sub>3</sub> and BaTiO<sub>3</sub> spheres, are shown in Figure S.5, Figure S.6, Figure S.7, Figure S.8 and Figure S.9, respectively. Only the  $\gamma$ -Al<sub>2</sub>O<sub>3</sub> spheres show a type IV isotherm, indicating mesoporosity. The other materials do not have measurable porosity below 50 nm (i.e., the pore sizes that can be evaluated by nitrogen sorption).

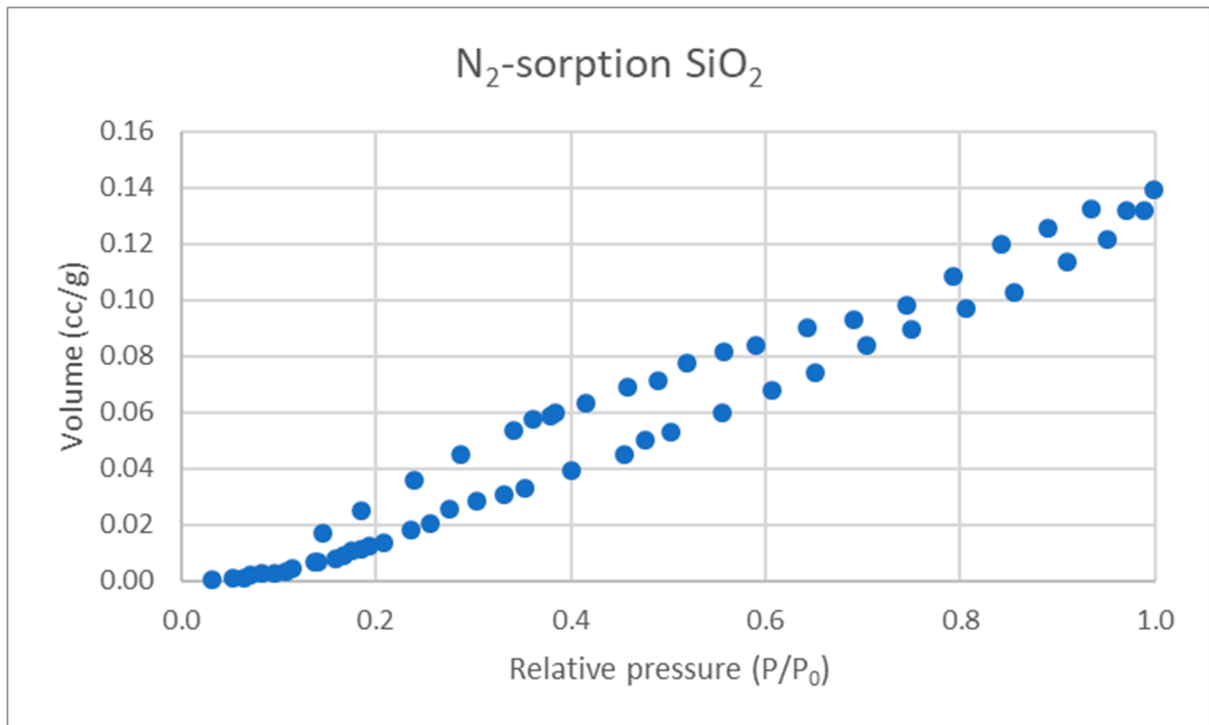

**Figure S.5: Nitrogen Sorption for SiO<sub>2</sub>**

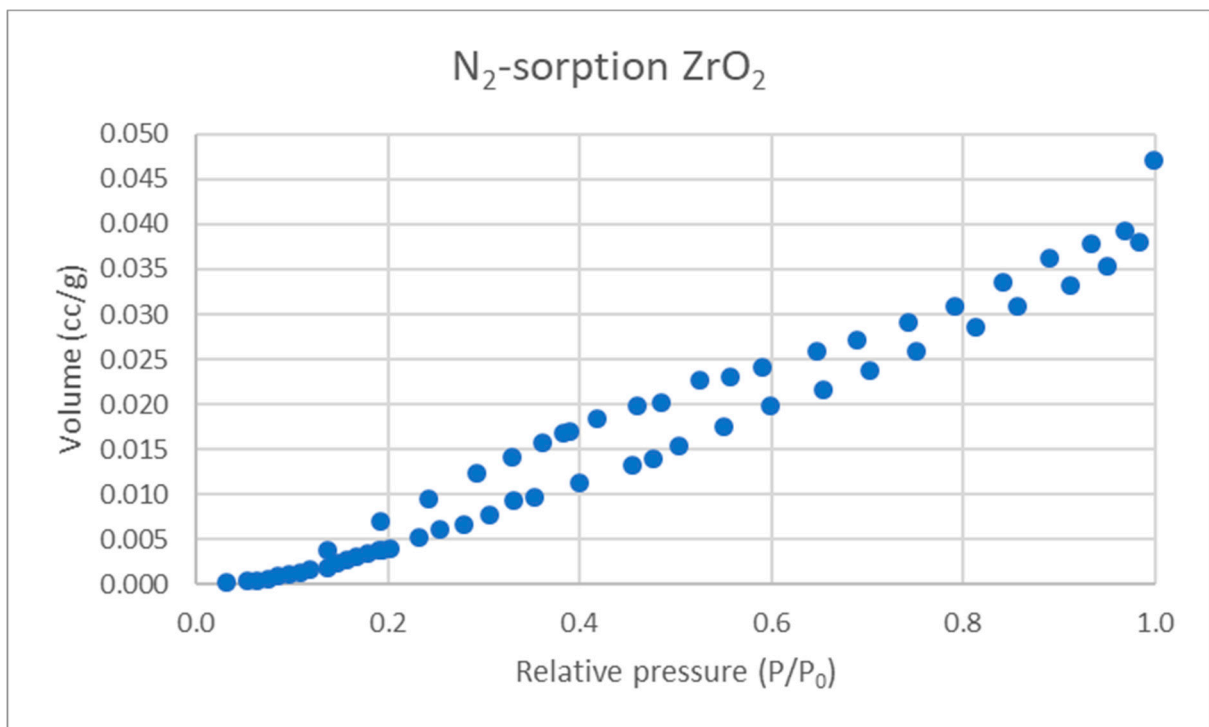

**Figure S.6: Nitrogen Sorption for ZrO<sub>2</sub>**

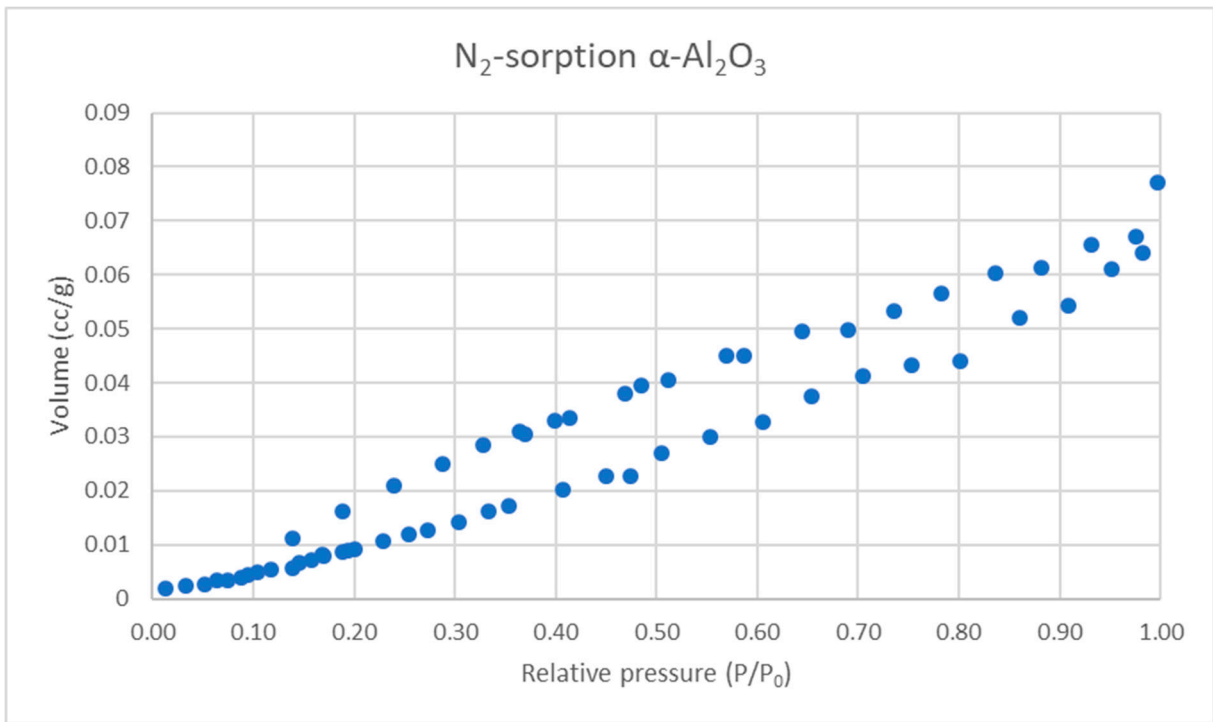

Figure S.7: Nitrogen Sorption for  $\alpha$ - $Al_2O_3$

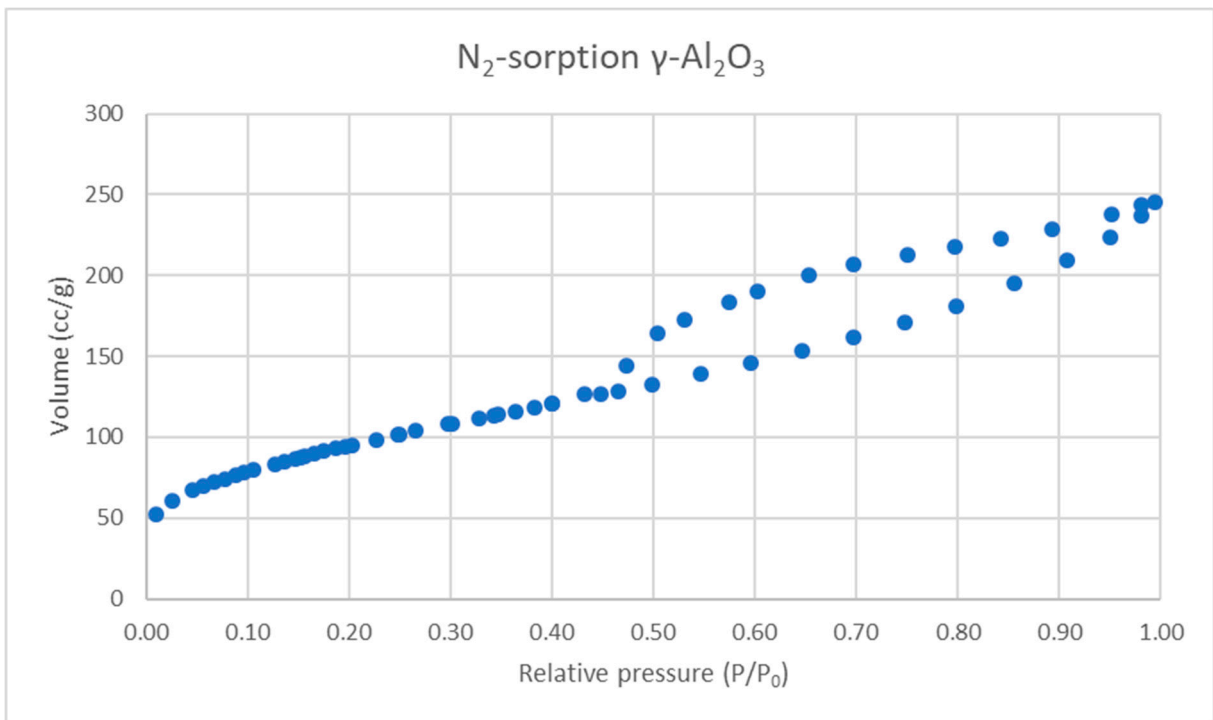

Figure S.8: Nitrogen Sorption for  $\gamma$ - $Al_2O_3$

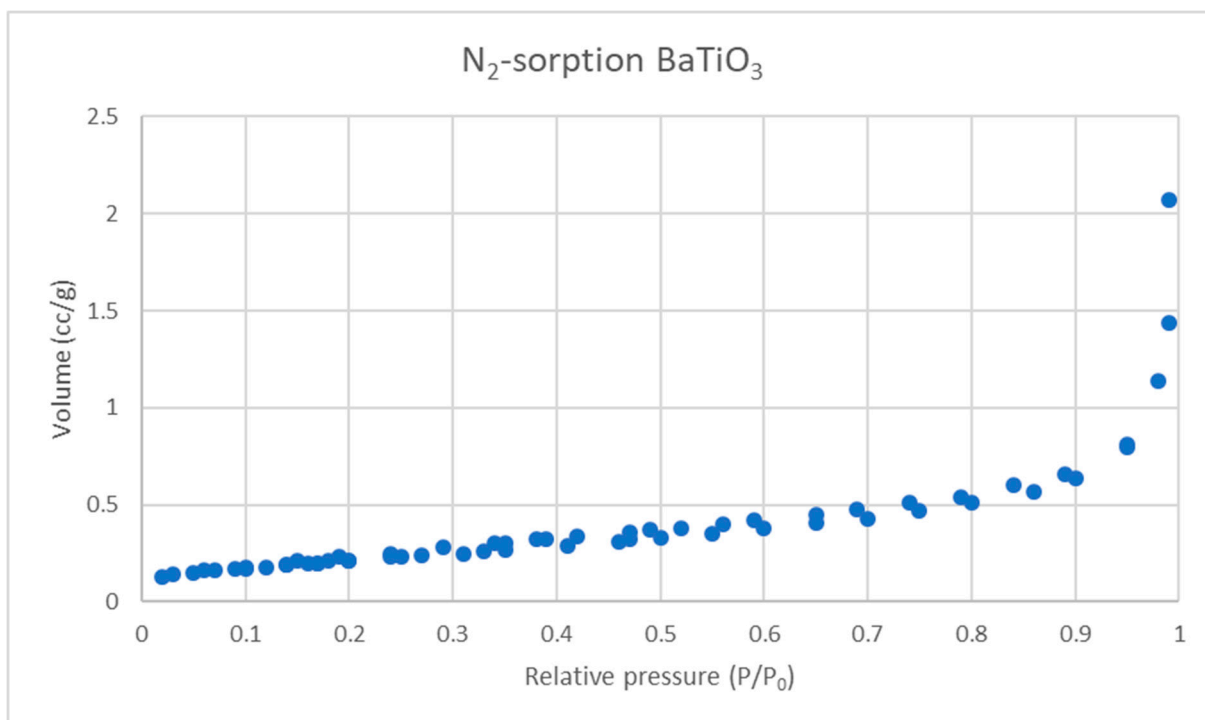

Figure S.9: Nitrogen Sorption for BaTiO<sub>3</sub>

### 2.3 Hg-porosimetry

Figure S.10, Figure S.11, Figure S.12, Figure S.13 and Figure S.14 show the Hg-porosimetry results, able to detect porosity above 8 nm up to micrometre sized micropores. Pore sizes and the total open pore volume of the SiO<sub>2</sub>, ZrO<sub>2</sub>,  $\alpha$ -Al<sub>2</sub>O<sub>3</sub>,  $\gamma$ -Al<sub>2</sub>O<sub>3</sub> and BaTiO<sub>3</sub> spheres are shown, respectively. The most important data for these figures (the total open pore volume and the pore size) are shown in Table S.1. Moreover, it is clear that all samples have a (limited) macroporosity (>0.05  $\mu$ m), but the amount of macropores and their size depend on the material.



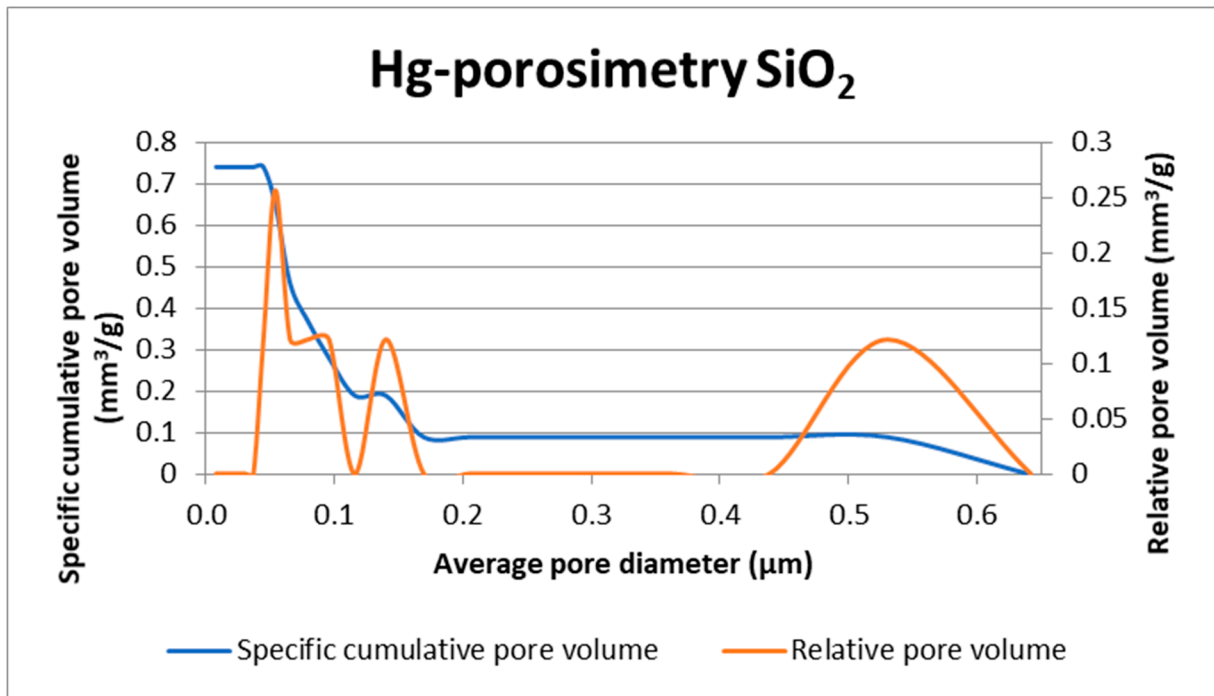

Figure S.10: Hg-porosimetry for SiO<sub>2</sub>

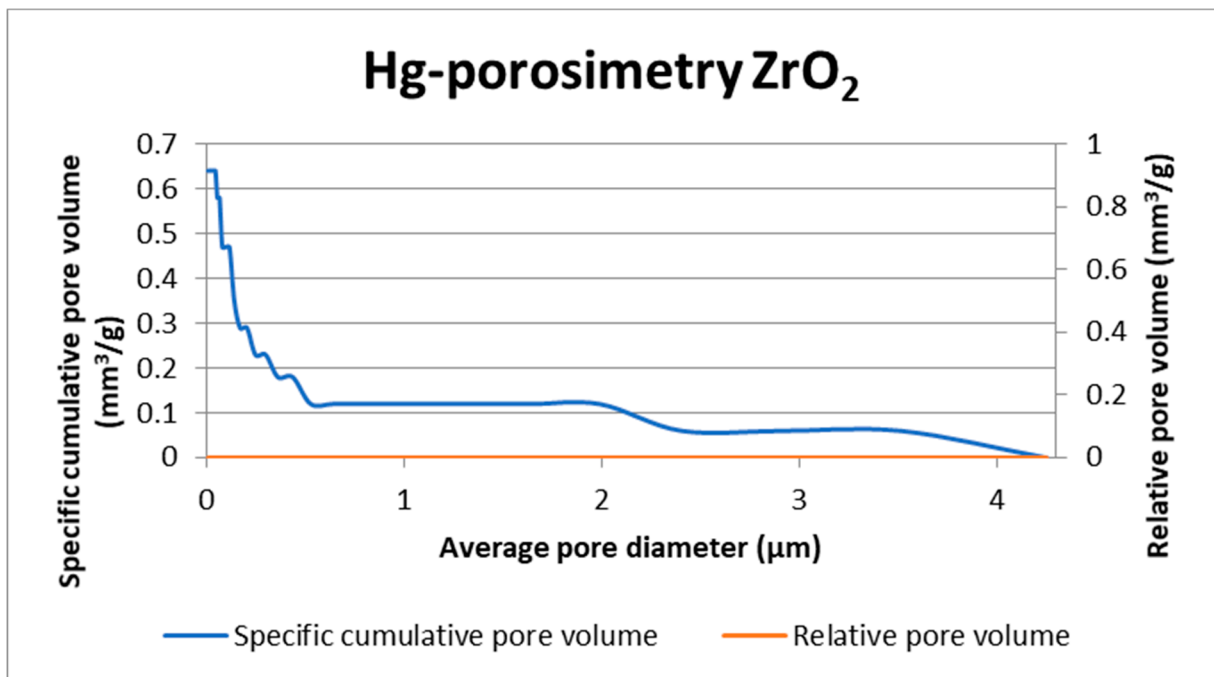

Figure S.11: Hg-porosimetry for ZrO<sub>2</sub>

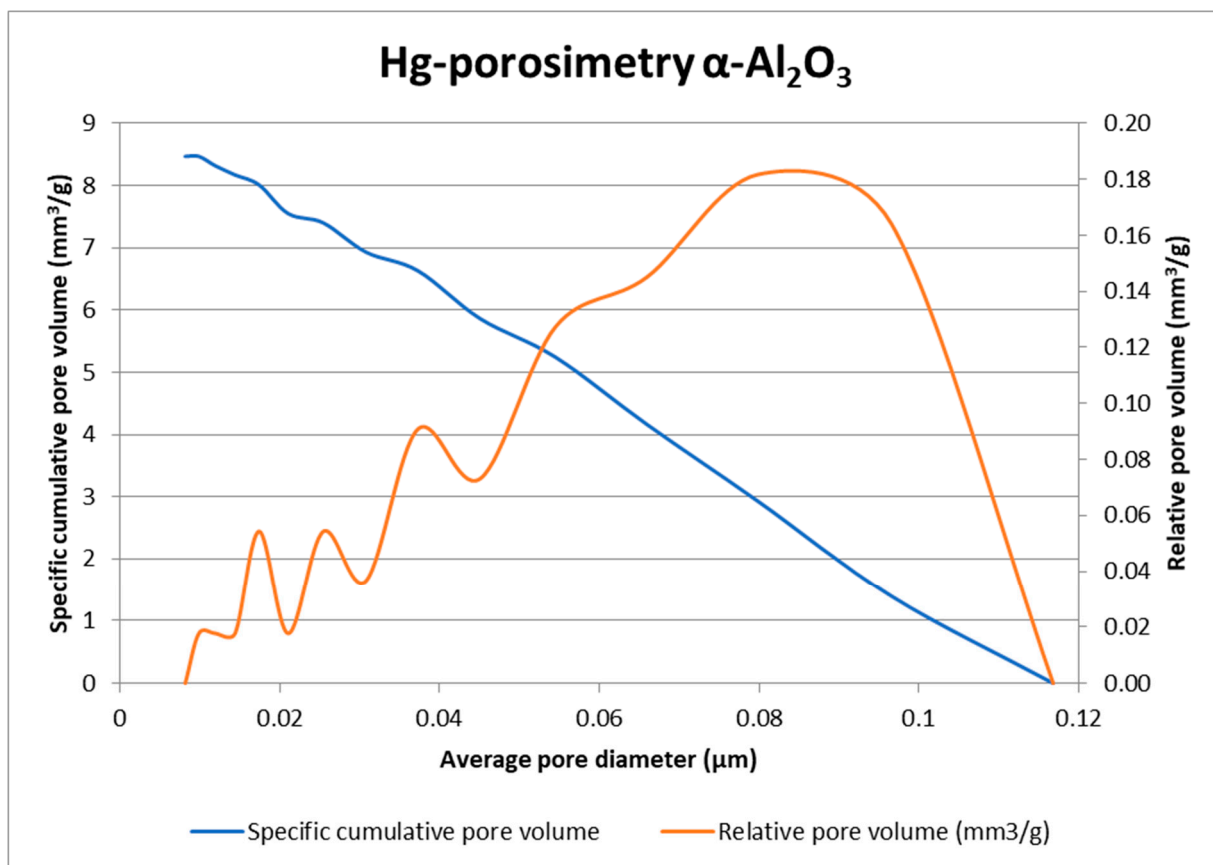

Figure S.12: Hg-porosimetry  $\alpha$ -Al<sub>2</sub>O<sub>3</sub>

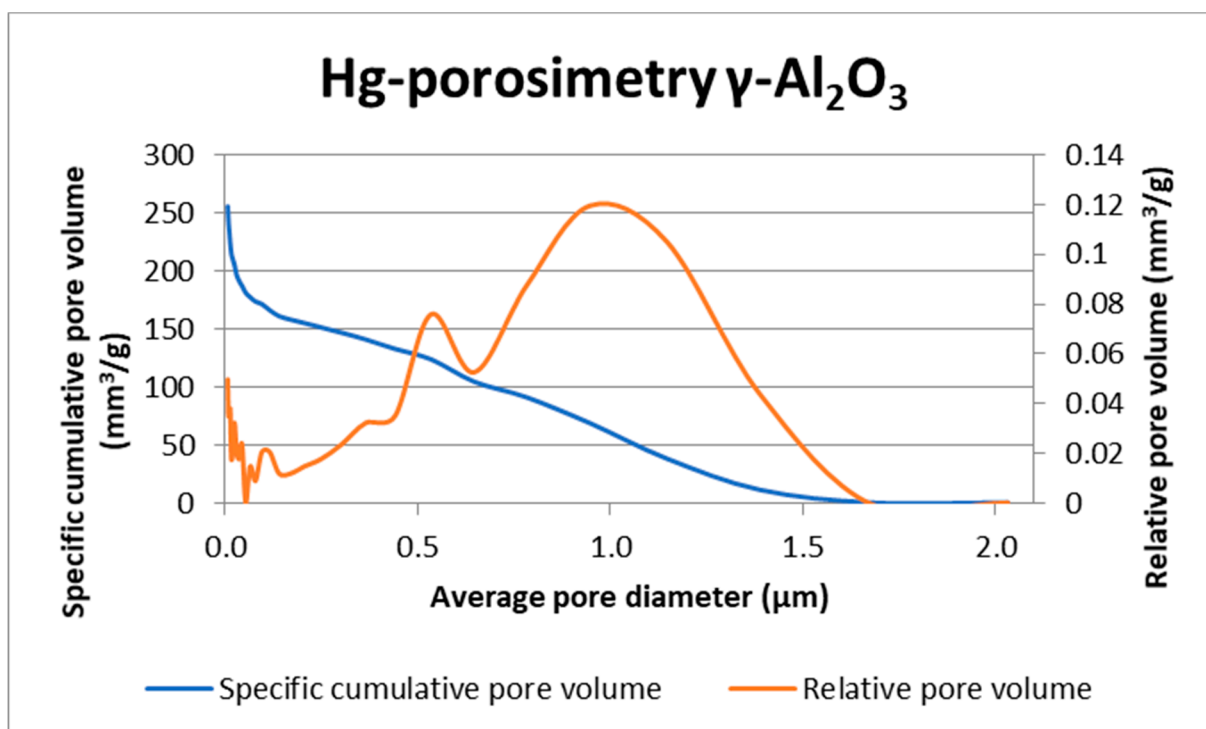

Figure S.13: Hg-porosimetry  $\gamma$ -Al<sub>2</sub>O<sub>3</sub>

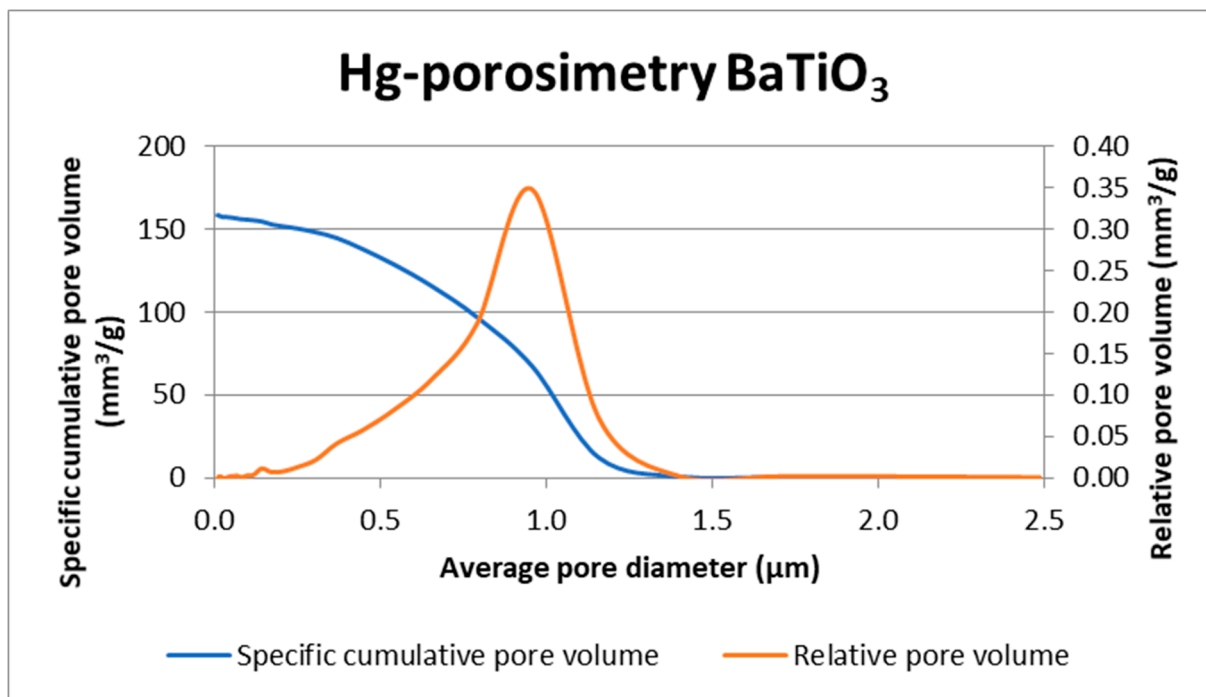

Figure S.14: Hg-porosimetry BaTiO<sub>3</sub>

## 2.4 SEM EDX

Table S.4: SEM-EDX measurements for all spheres before and after plasma, measured at 3 points per sphere.

|           | SiO <sub>2</sub> |              | ZrO <sub>2</sub> |              | α-Al <sub>2</sub> O <sub>3</sub> |              | γ-Al <sub>2</sub> O <sub>3</sub> |              | BaTiO <sub>3</sub> |              |
|-----------|------------------|--------------|------------------|--------------|----------------------------------|--------------|----------------------------------|--------------|--------------------|--------------|
|           | Before plasma    | After plasma | Before plasma    | After plasma | Before plasma                    | After plasma | Before plasma                    | After plasma | Before plasma      | After plasma |
|           | Weight%          | Weight%      | Weight%          | Weight%      | Weight%                          | Weight%      |                                  |              |                    |              |
| <b>O</b>  | 45.8±0.9         | 45.8±0.8     | 26.0±0.1         | 26.0±0.1     | 49±4                             | 47±0.1       | 47±0                             | 47±0         | 20.8±0.2           | 20.7±0.1     |
| <b>Si</b> | 33±2             | 32±1         |                  |              |                                  |              | 0.2±0                            | 0.2±0        |                    |              |
| <b>Na</b> | 11±2             | 14±3         |                  |              |                                  |              |                                  |              |                    |              |
| <b>Ca</b> | 8±4              | 5±1          | 0.2±0            | 0±0          | 0±0                              | 0.2±0.1      |                                  |              |                    |              |
| <b>Mg</b> | 2.2±0.5          | 2.6±0.3      |                  |              |                                  |              |                                  |              |                    |              |
| <b>Al</b> | 0.5±0.2          | 0.5±0.2      | 0.5±0.3          | 0.3±0.1      | 52±2                             | 52.5±0.4     | 52.8±0                           | 52.6±0.1     | 0.2±0              | 0±0          |
| <b>K</b>  | 0.4±0            | 0.3±0.3      |                  |              |                                  |              |                                  |              |                    |              |
| <b>Zr</b> |                  |              | 71.5±0.2         | 72.5±0.2     |                                  |              |                                  |              |                    |              |
| <b>Hf</b> |                  |              | 1.8±0.1          | 1.2±0.2      |                                  |              |                                  |              |                    |              |
| <b>Ba</b> |                  |              |                  |              |                                  |              |                                  |              | 58.4±0.6           | 58.7±0.1     |
| <b>Ti</b> |                  |              |                  |              |                                  |              |                                  |              | 20.7±0.4           | 20.7±0.1     |

The SEM-EDX data (Table S.4) of  $\text{SiO}_2$ ,  $\alpha\text{-Al}_2\text{O}_3$ ,  $\gamma\text{-Al}_2\text{O}_3$  and  $\text{BaTiO}_3$  show no significant difference when analysing the spheres before and after plasma. When comparing the results for  $\text{ZrO}_2$ , we can see that the content of Ca and Hf decreases after plasma exposure, but the deviation is minimal. Therefore, no conclusions can be drawn based on these measurements.

### 3. GAS CHROMATOGRAM

Figure S.15 shows an example of a chromatogram obtained from an experiment with the non-packed reactor at 50ml/min. It is shown to aid with the estimation of the abundance of the components that were not identified/calibrated in the GC and thus could be the cause for the missing percentages in the carbon, hydrogen and oxygen balance.

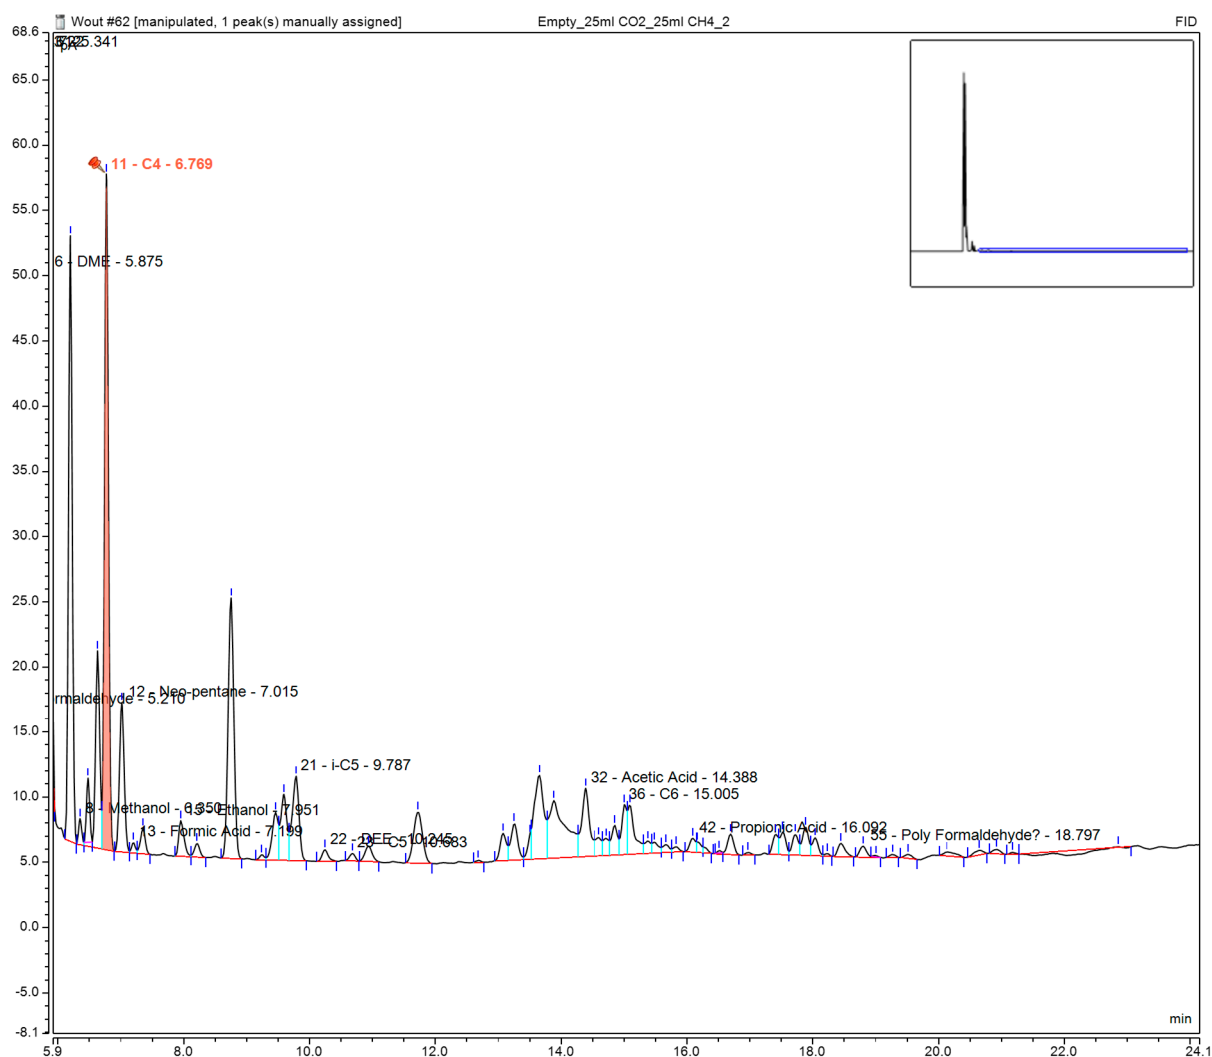

Figure S.15: Part of a gas chromatogram obtained in this work, zoomed in on the baseline.

### 4. MATERIAL STABILITY AGAINST COKING

None of the samples showed weight loss in TGA (performed up to 800 °C, so above the decoking temperature [15]). This indicates the limited amount of coke formation, which confirms the literature that the plasma process will induce less coking than thermal DRM [16]. Nevertheless, there are some coloured (black) spots when the packing is removed from the reactor, hence a more detailed analysis via Raman microscopy has been done to determine its

origin. This shows that some coking is still present. The measurements were performed with a Horiba Xplora Plus micro-Raman, with a 50x magnification and a wavelength of 532 nm. Clear signals of the D and G bands of carbon can be observed for the SiO<sub>2</sub> packing (Figure S.16) at 1330 cm<sup>-1</sup> and 1595 cm<sup>-1</sup>, including shoulders around 1472 cm<sup>-1</sup> and 1221 cm<sup>-1</sup>, as well as non-resolved overtone signals. When looking more closely to the  $\alpha$ -Al<sub>2</sub>O<sub>3</sub> and ZrO<sub>2</sub> packing materials, unresolved broad signals can be observed in the region where also coke displays signals. However, as the signals are not resolved, it is difficult to confirm that this is due to some limited coke formation. Moreover, there was no detectable signal when measuring the sphere, focussing on a black spot. For all spheres, the Raman spectrum before and after plasma is shown, and for  $\alpha$ -Al<sub>2</sub>O<sub>3</sub>,  $\gamma$ -Al<sub>2</sub>O<sub>3</sub> and BaTiO<sub>3</sub>, a second figure shows a zoomed-in frame, to better vision the coking regions.

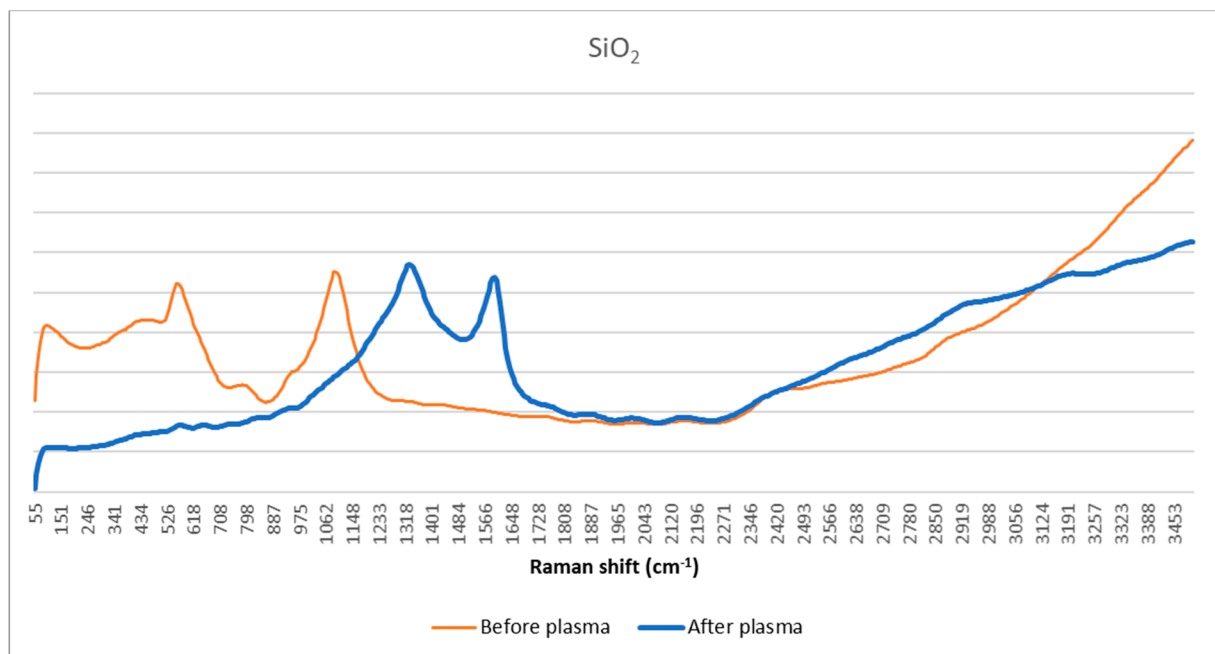

**Figure S.16: Raman spectrum for SiO<sub>2</sub>, before and after plasma exposure.**

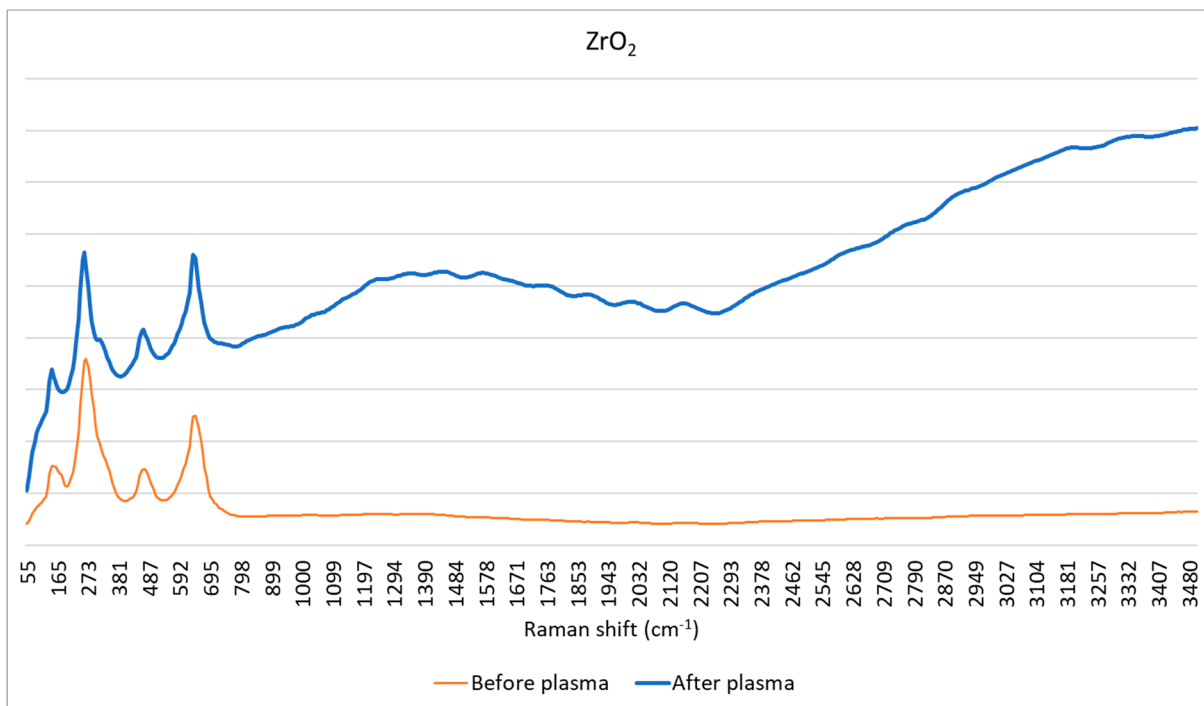

Figure S.17: Raman spectrum for  $ZrO_2$ , before and after plasma exposure.

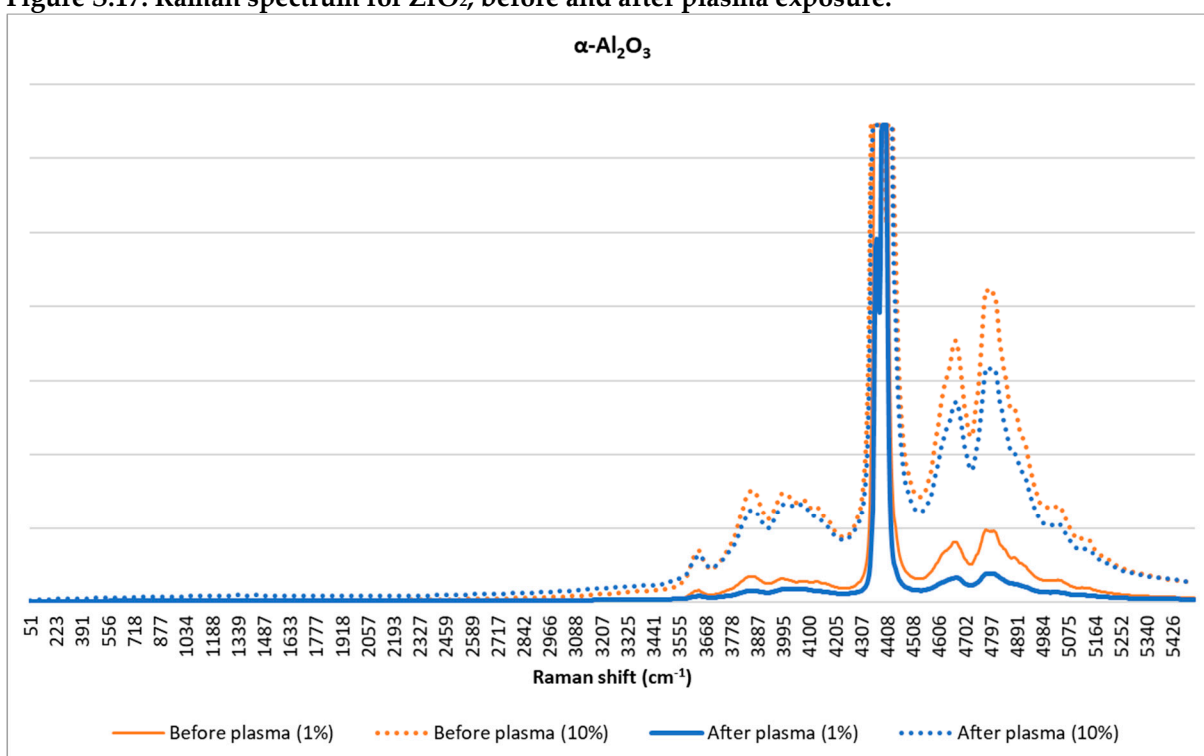

Figure S.18: Raman spectrum for  $\alpha-Al_2O_3$ , before and after plasma exposure. For both spheres (before and after plasma), 2 spectra are recorded: one with 90% of the light filtered out, and one with 99% of the light filtered out.



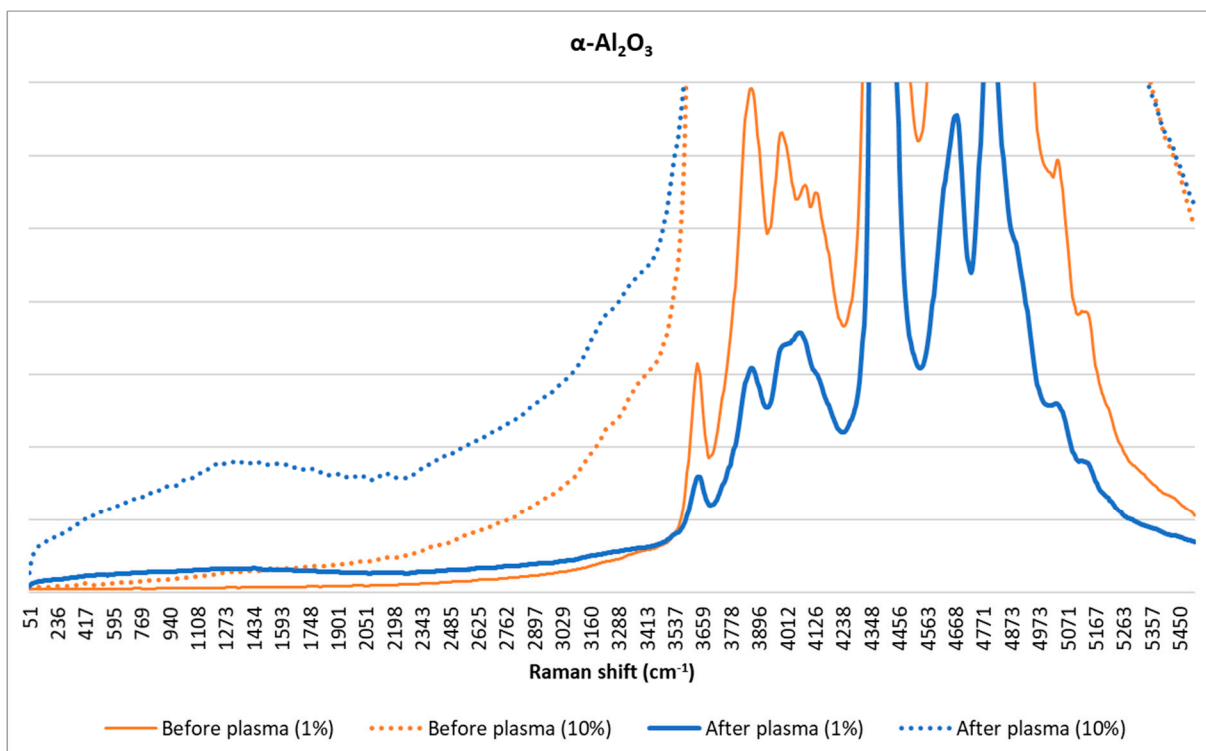

Figure S.19: Zoomed-in (at coking regions) Raman spectrum for  $\alpha\text{-Al}_2\text{O}_3$ , before and after plasma exposure. For both spheres (before and after plasma), 2 spectra are recorded: one with 90% of the light filtered out, and one with 99% of the light filtered out.

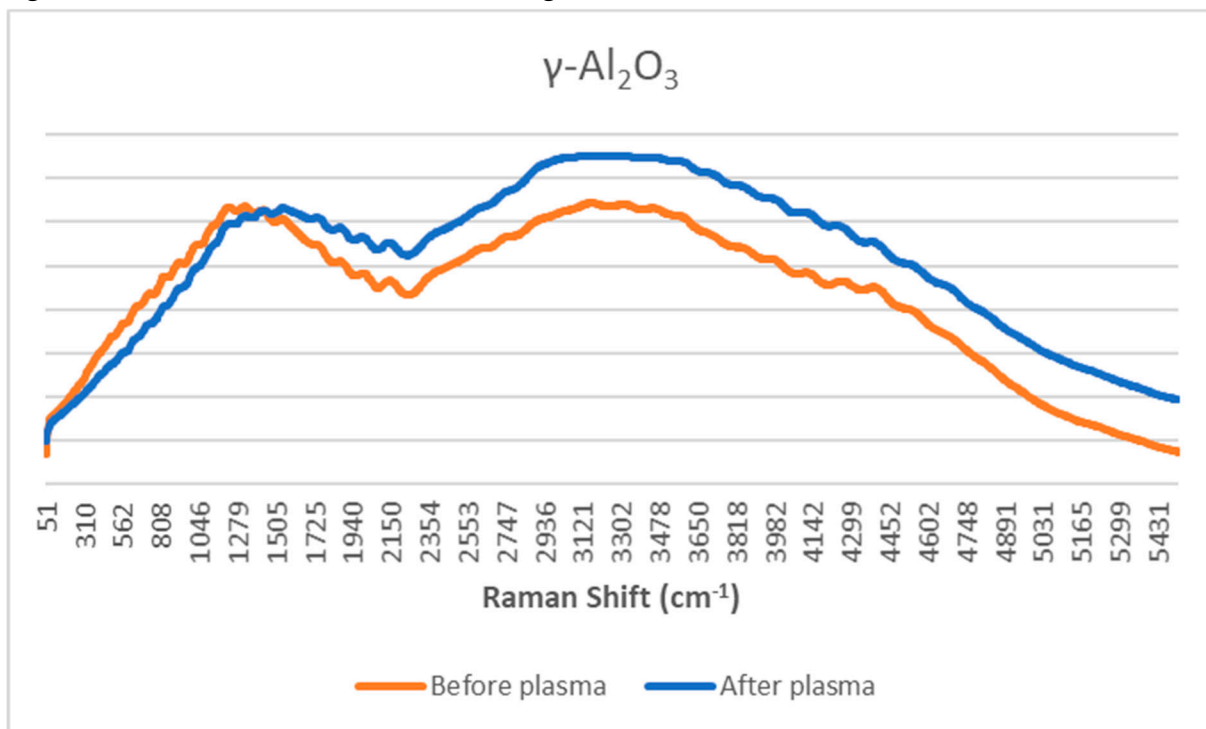

Figure S.20: Raman spectrum for  $\gamma\text{-Al}_2\text{O}_3$ , before and after plasma exposure.

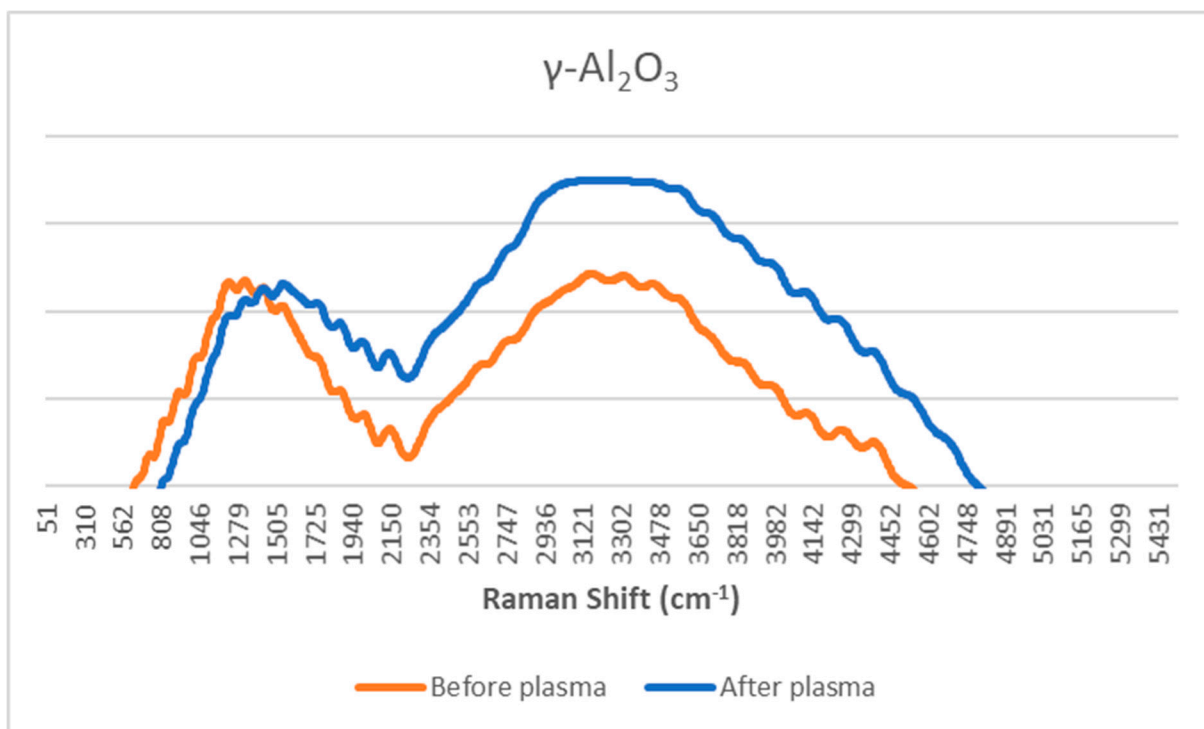

Figure S.21: Zoomed-in (at coking regions) Raman spectrum for  $\gamma\text{-Al}_2\text{O}_3$ , before and after plasma exposure

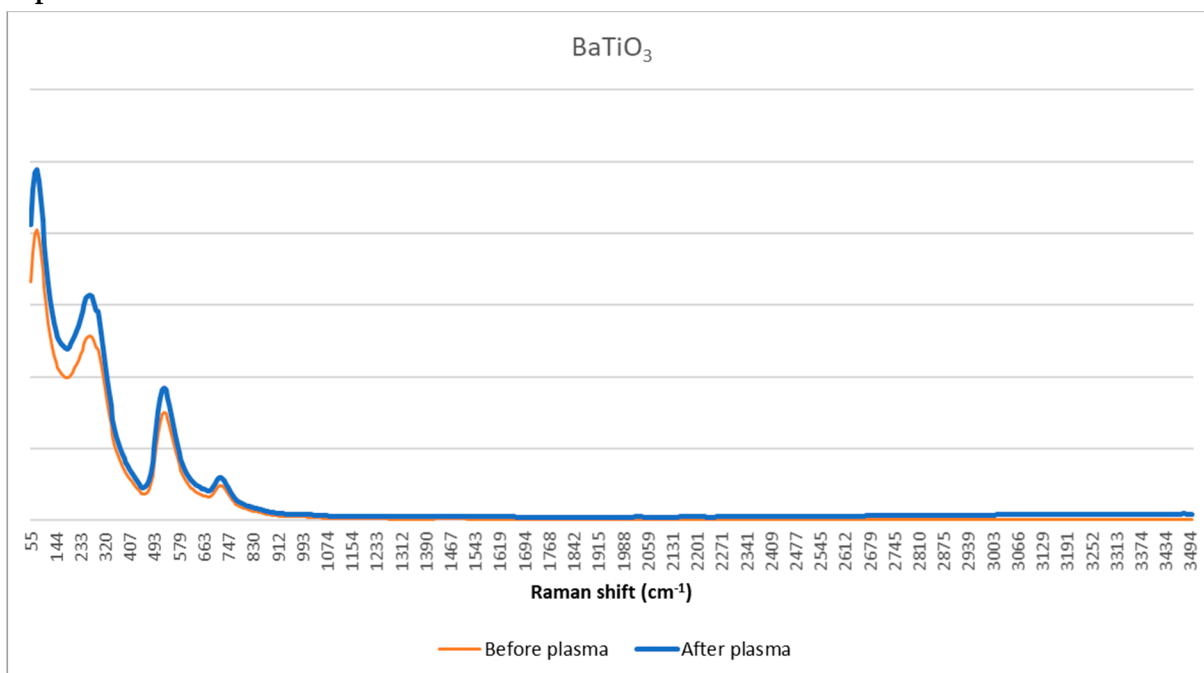

Figure S.22: Raman spectrum for  $\text{BaTiO}_3$ , before and after plasma exposure

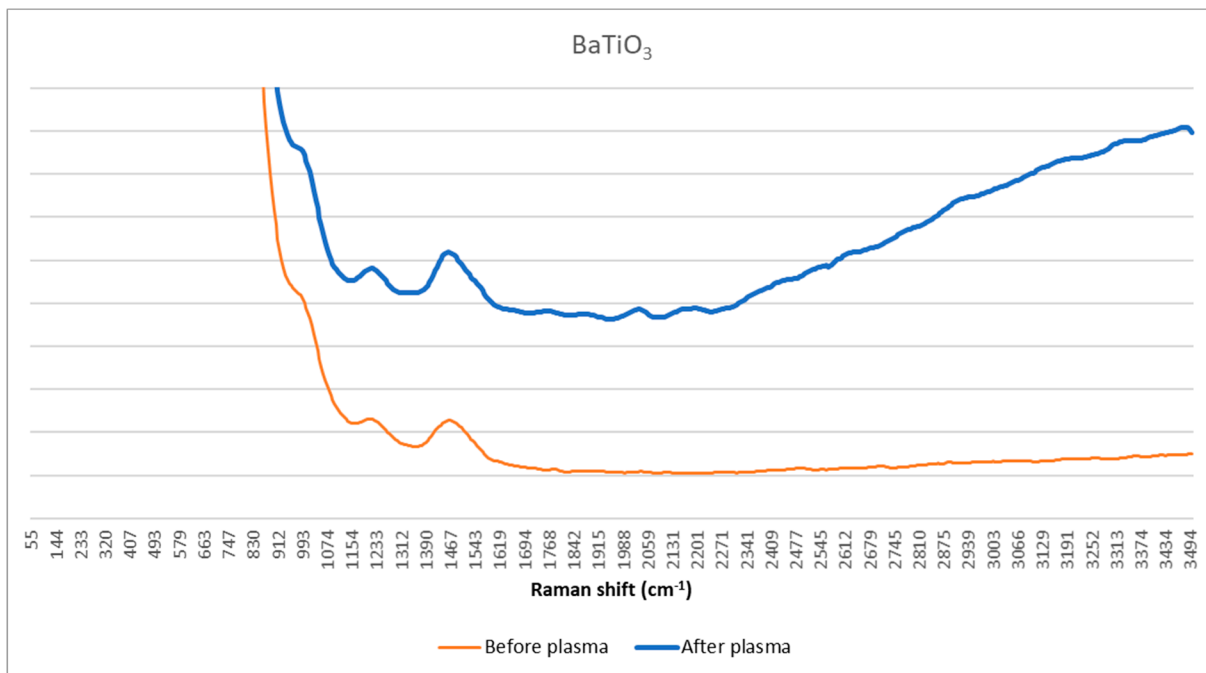

Figure S.23: Zoomed-in (at coking regions) Raman spectrum for  $\text{BaTiO}_3$ , before and after plasma exposure

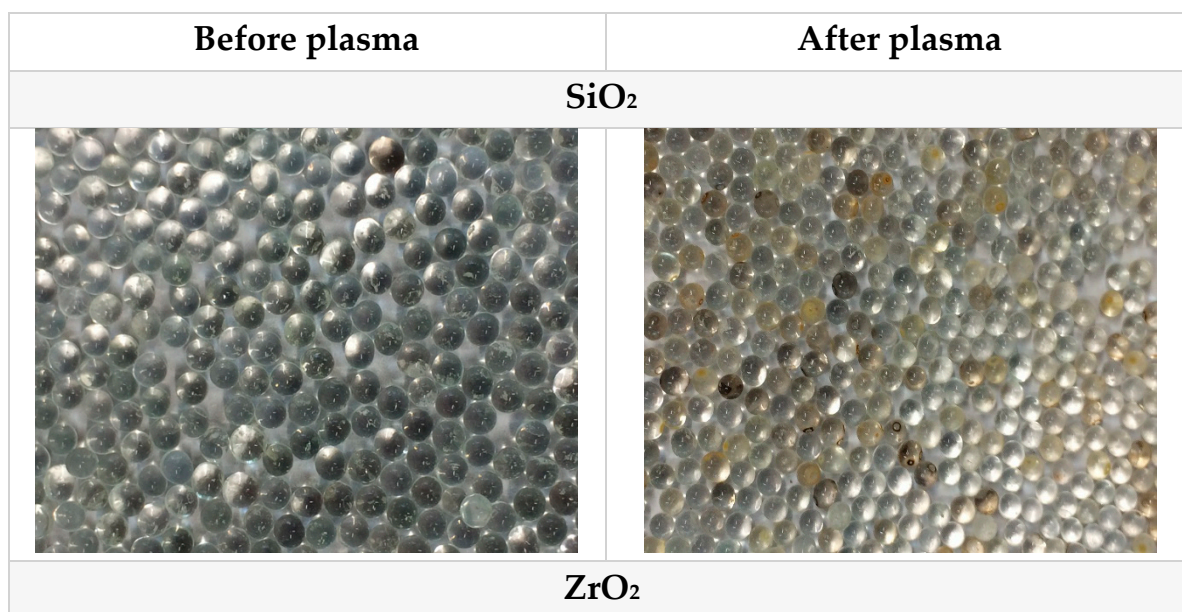

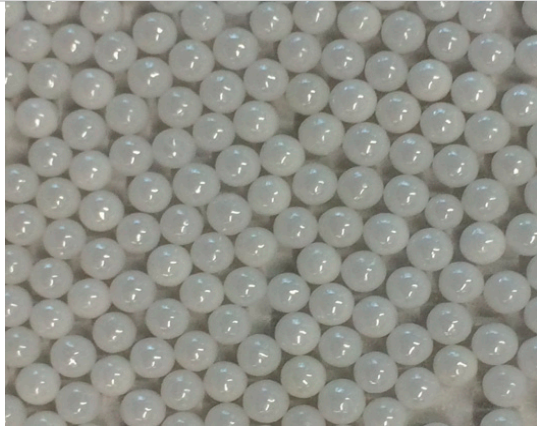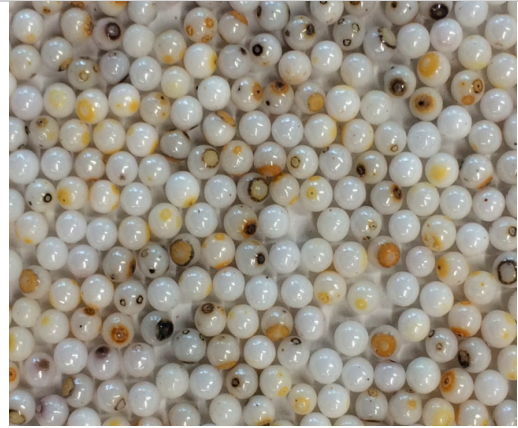

$\alpha\text{-Al}_2\text{O}_3$

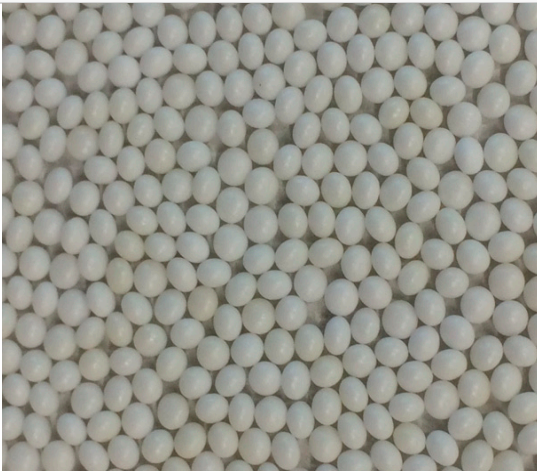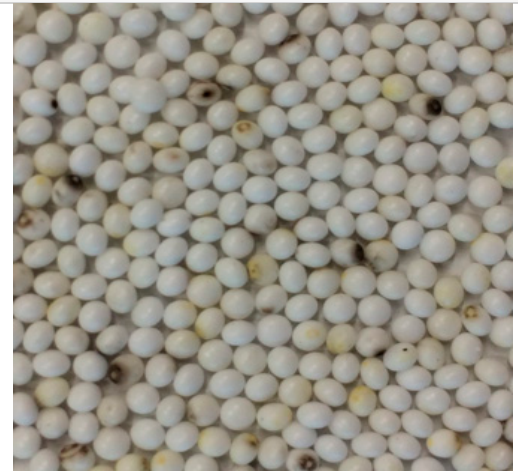

$\gamma\text{-Al}_2\text{O}_3$

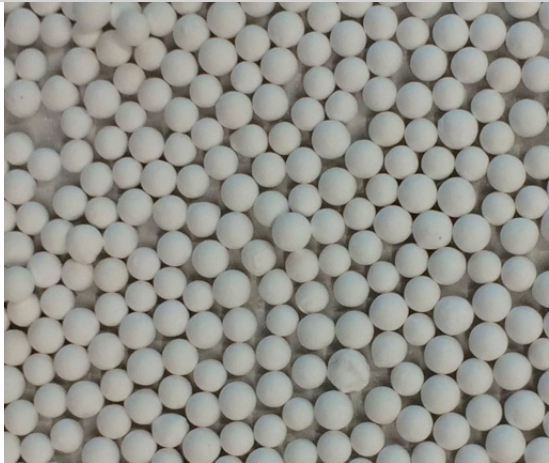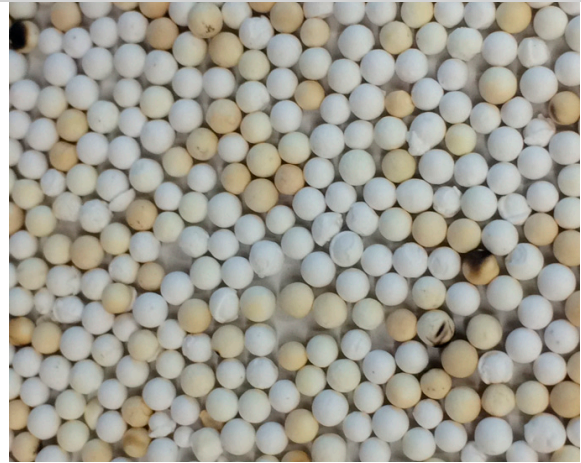

$\text{BaTiO}_3$

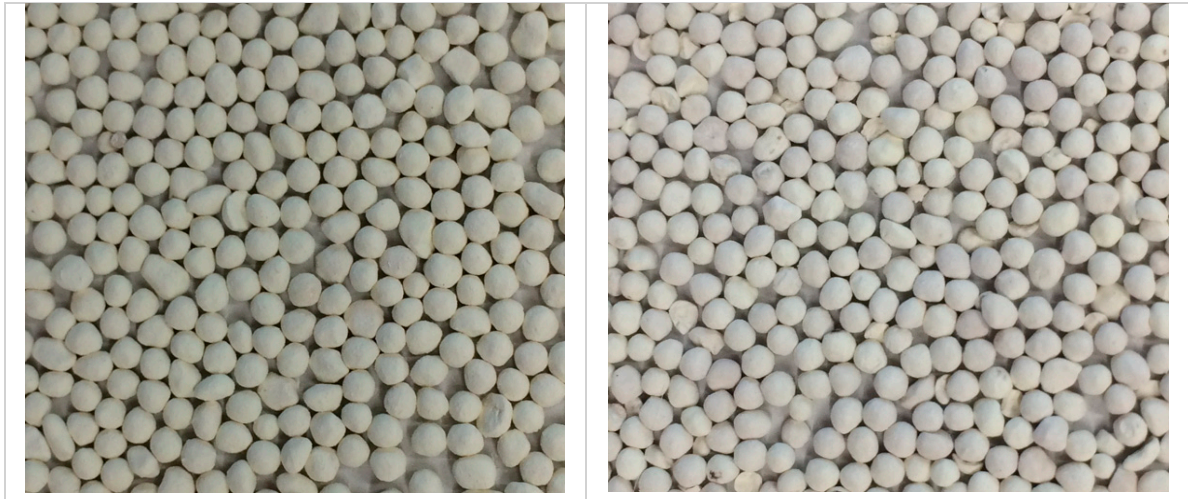

Figure S.24: visual image of the spheres before and after plasma treatment.

## 5. DETAILED CARBON, HYDROGEN AND OXYGEN BALANCES

First, for each element (carbon, hydrogen, oxygen) a complete balance is shown, with a detailed contribution of each component (figures: “total balance”). Then, to ensure better visibility, the same values were plotted, without the presence of the non-converted feed components ( $\text{CO}_2$  and  $\text{CH}_4$ ) (figures: “detailed balance”). Finally, a figure is shown with the same values as in the latter figure, but normalised to 100%.

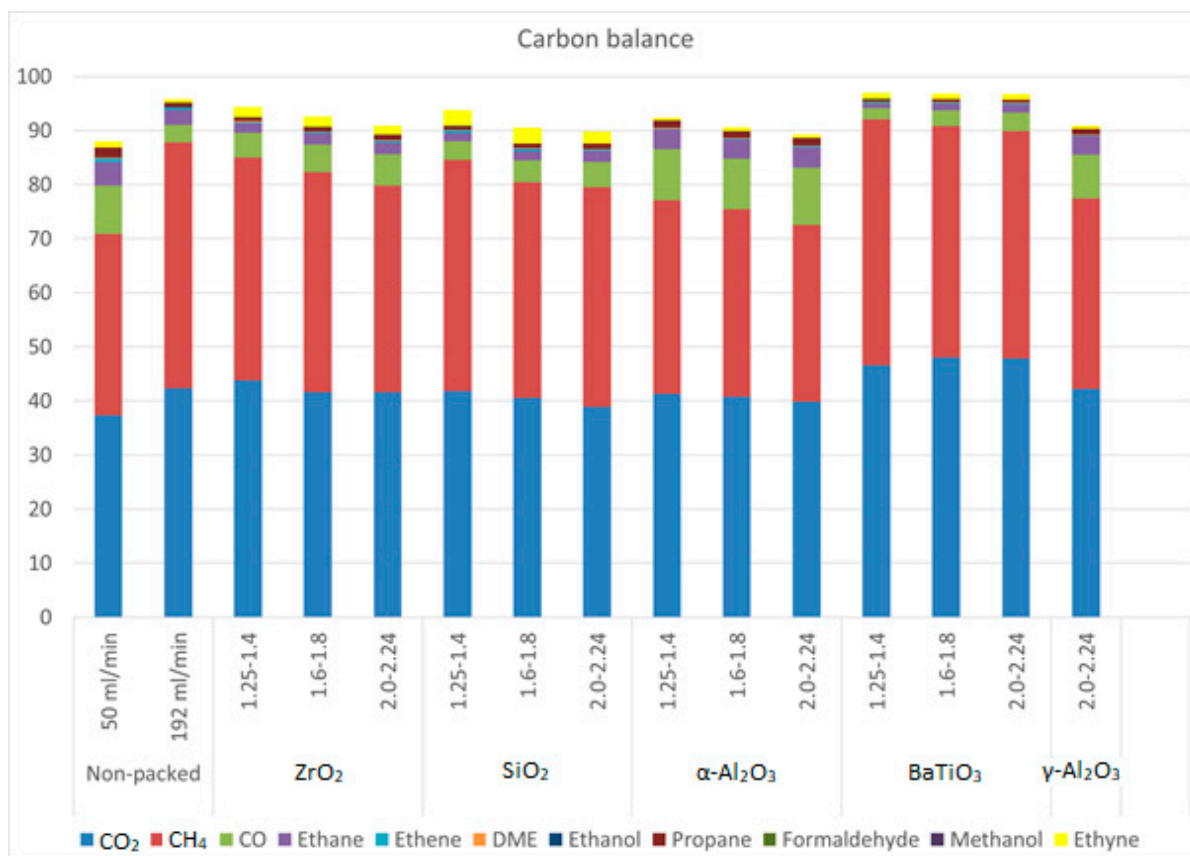

Figure S.25: Total carbon balance for different sphere sizes and materials.

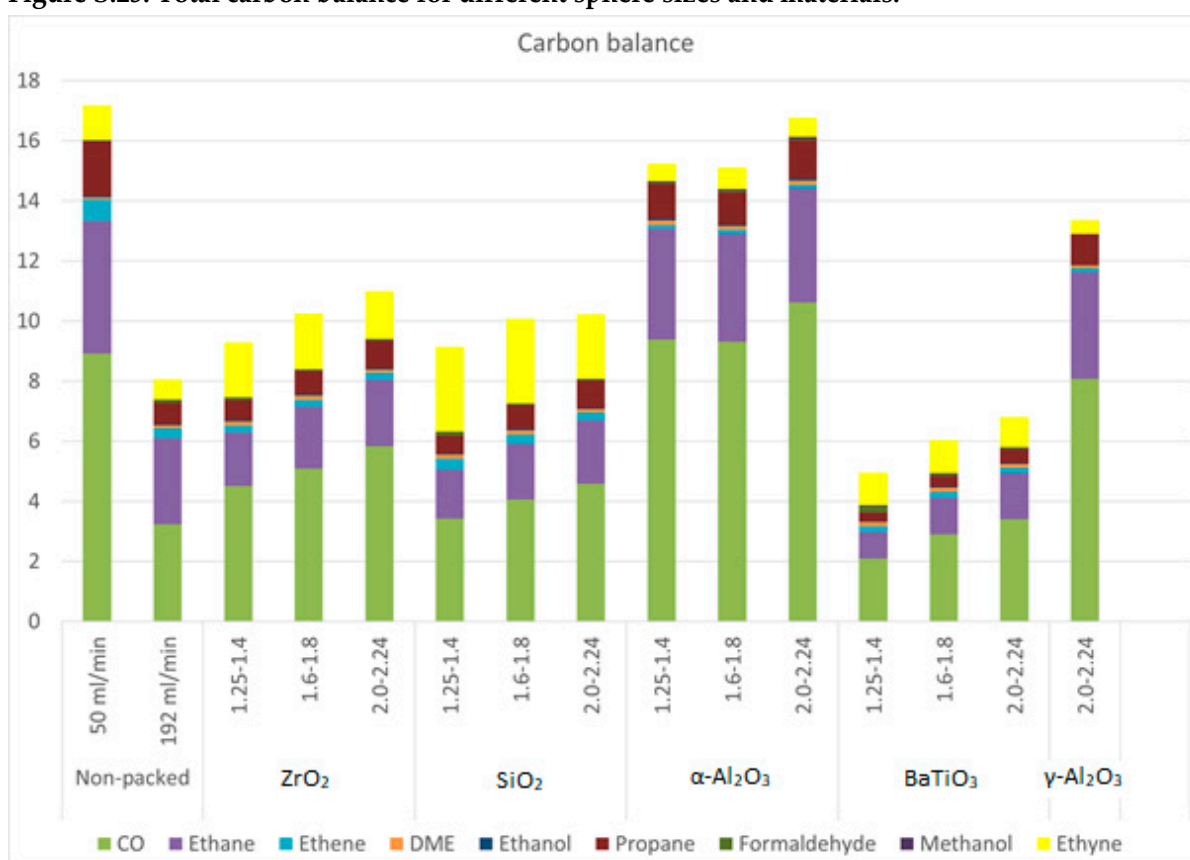

Figure S.26: Detailed carbon balance for different sphere sizes and materials, without CO<sub>2</sub> and CH<sub>4</sub> contribution.

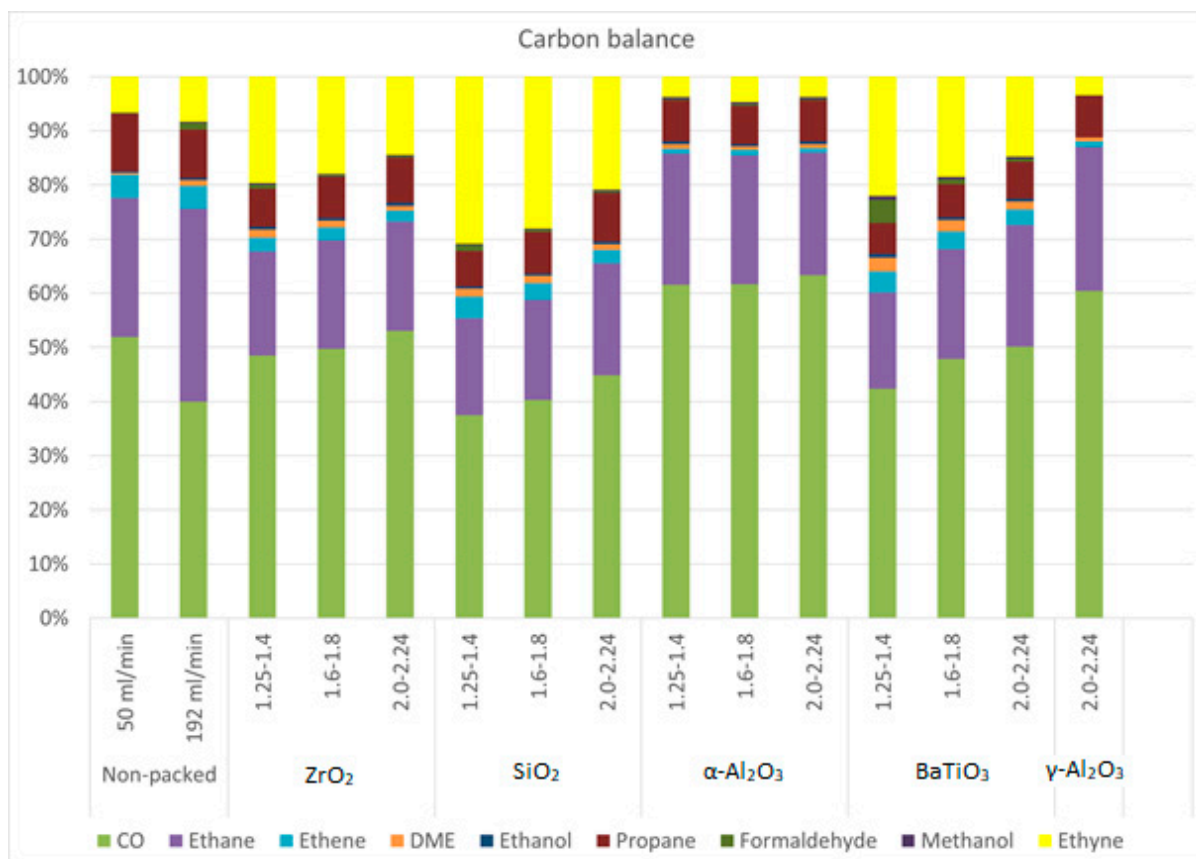

Figure S.27: Normalized carbon balance for different sphere sizes and materials, without CO<sub>2</sub> and CH<sub>4</sub> contribution.

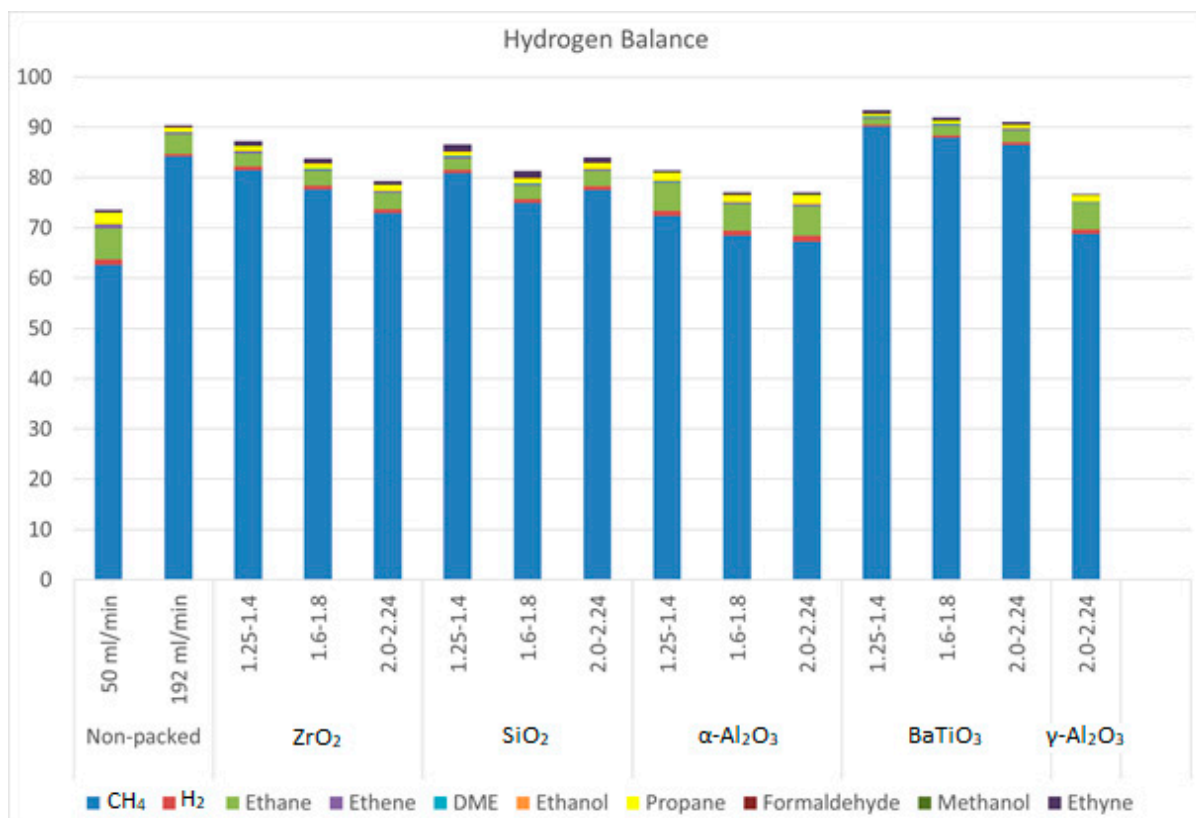

Figure S.28: Total hydrogen balance for different sphere sizes and materials

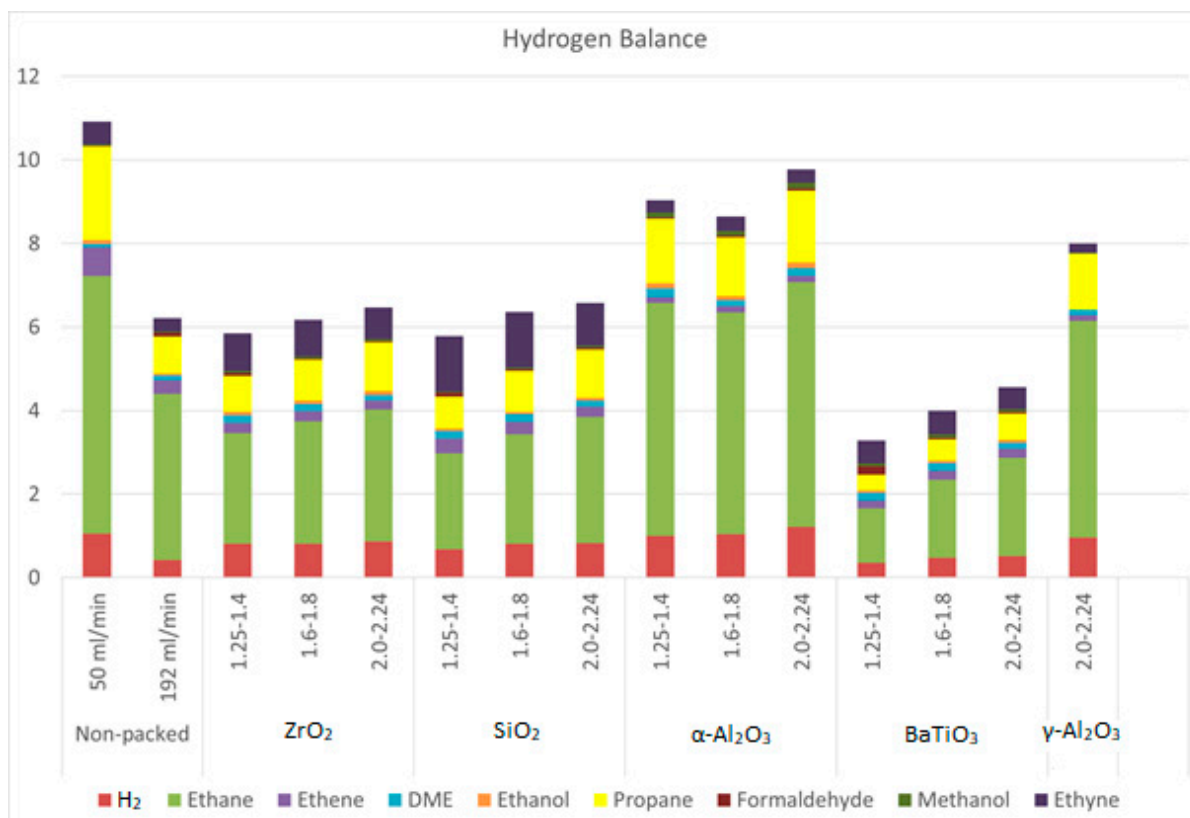

Figure S.29: Detailed hydrogen balance for different sphere sizes and materials, without CH<sub>4</sub> contribution

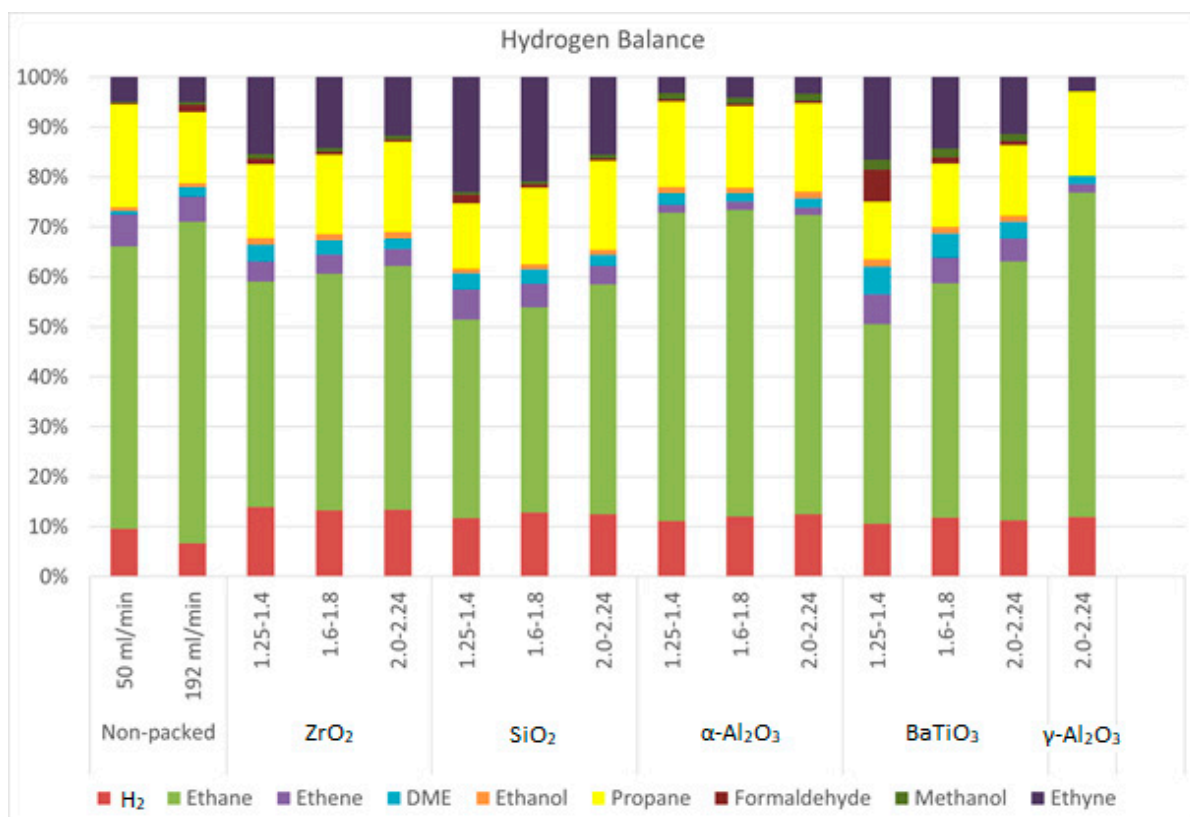

Figure S.30: Normalized hydrogen balance for different sphere sizes and materials, without CH<sub>4</sub> contribution



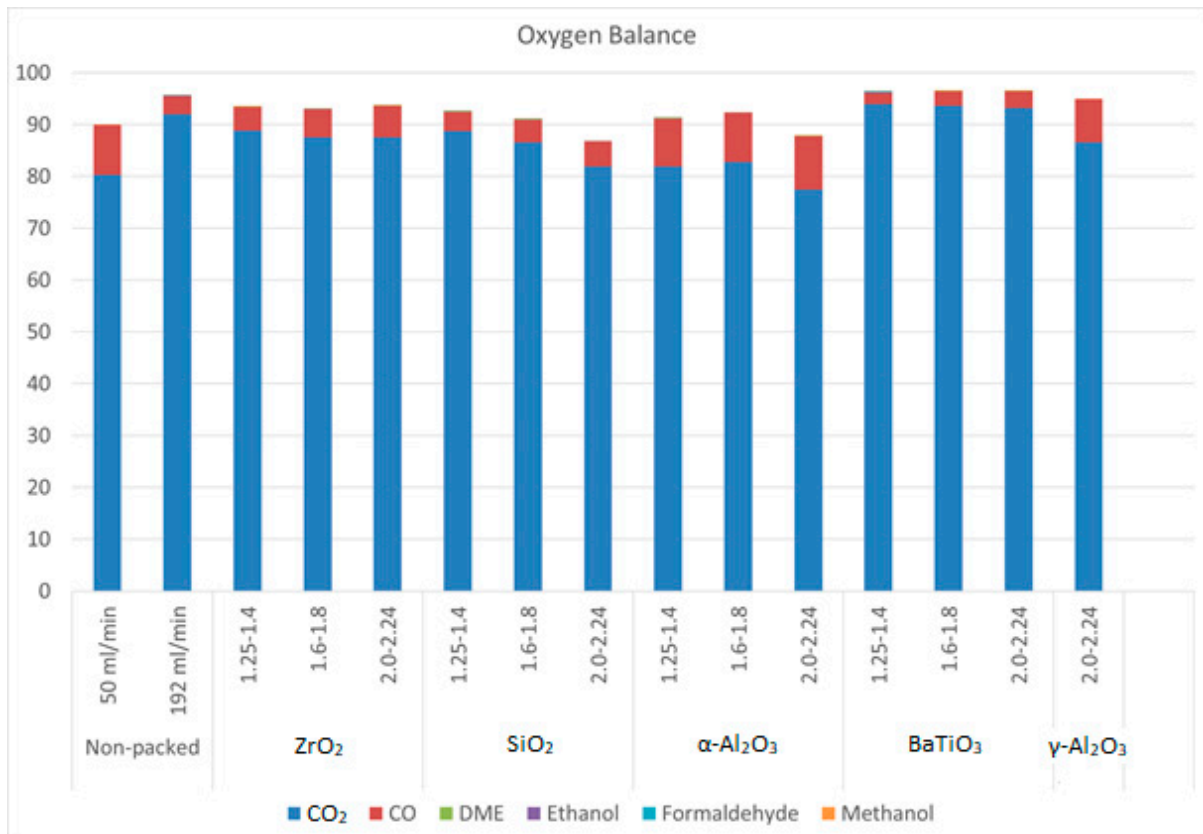

Figure S.31: Total oxygen balance for different sphere sizes and materials

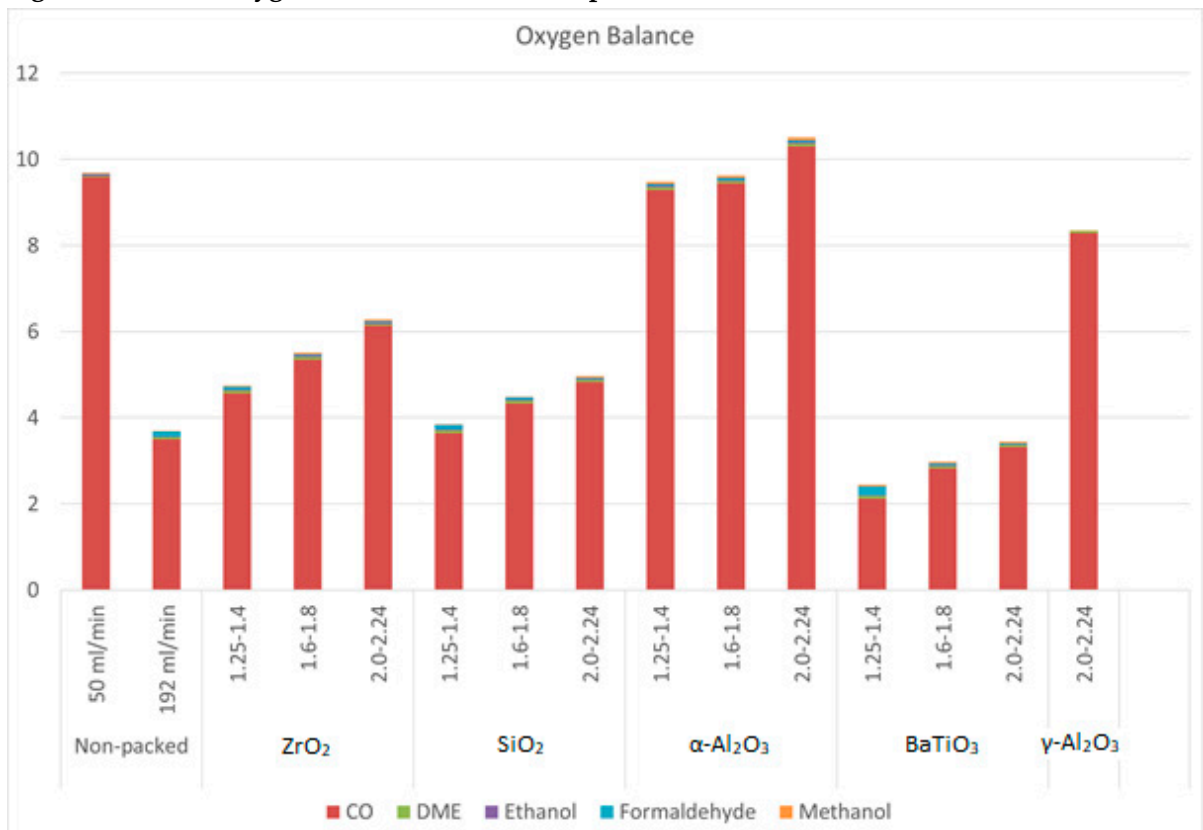

Figure S.32: Detailed oxygen balance for different sphere sizes and materials, without CO<sub>2</sub> contribution

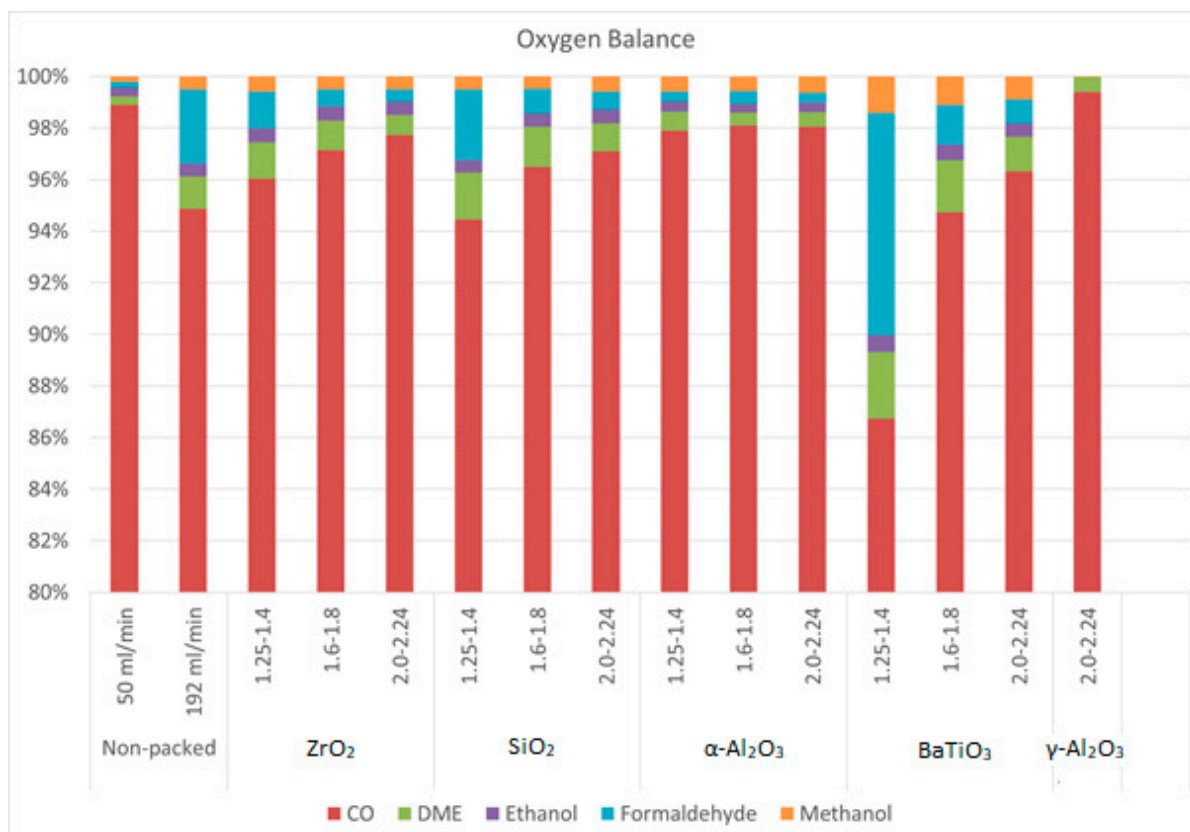

Figure S.33: Normalized oxygen balance for different sphere sizes and materials, without CO<sub>2</sub> contribution

## 6. YIELDS AND SELECTIVITIES

Table S.5: Identified products, ranked in decreasing order of their yields, for the different packing materials and the non-packed reactor. The components highlighted are present for more than 1%, the others for more than 100 ppm.

|                                  |    |                               |                               |                               |                               |                               |                                       |                                       |                                            |                                            |
|----------------------------------|----|-------------------------------|-------------------------------|-------------------------------|-------------------------------|-------------------------------|---------------------------------------|---------------------------------------|--------------------------------------------|--------------------------------------------|
| Non-packed                       | CO | C <sub>2</sub> H <sub>6</sub> | H <sub>2</sub>                | C <sub>2</sub> H <sub>2</sub> | C <sub>3</sub> H <sub>8</sub> | C <sub>2</sub> H <sub>4</sub> | CH <sub>2</sub> O                     | C <sub>2</sub> H <sub>6</sub> O (DME) | C <sub>2</sub> H <sub>5</sub> OH (Ethanol) | CH <sub>3</sub> OH                         |
| ZrO <sub>2</sub>                 | CO | C <sub>2</sub> H <sub>6</sub> | C <sub>2</sub> H <sub>2</sub> | H <sub>2</sub>                | C <sub>3</sub> H <sub>8</sub> | C <sub>2</sub> H <sub>4</sub> | C <sub>2</sub> H <sub>6</sub> O (DME) | CH <sub>2</sub> O                     | C <sub>2</sub> H <sub>5</sub> OH (Ethanol) | CH <sub>3</sub> OH                         |
| SiO <sub>2</sub>                 | CO | C <sub>2</sub> H <sub>2</sub> | C <sub>2</sub> H <sub>6</sub> | H <sub>2</sub>                | C <sub>3</sub> H <sub>8</sub> | C <sub>2</sub> H <sub>4</sub> | C <sub>2</sub> H <sub>6</sub> O (DME) | CH <sub>2</sub> O                     | CH <sub>3</sub> OH                         | C <sub>2</sub> H <sub>5</sub> OH (Ethanol) |
| α-Al <sub>2</sub> O <sub>3</sub> | CO | C <sub>2</sub> H <sub>6</sub> | H <sub>2</sub>                | C <sub>3</sub> H <sub>8</sub> | C <sub>2</sub> H <sub>2</sub> | C <sub>2</sub> H <sub>4</sub> | C <sub>2</sub> H <sub>6</sub> O (DME) | CH <sub>3</sub> OH                    | CH <sub>2</sub> O                          | C <sub>2</sub> H <sub>5</sub> OH (Ethanol) |
| γ-Al <sub>2</sub> O <sub>3</sub> | CO | C <sub>2</sub> H <sub>6</sub> | H <sub>2</sub>                | C <sub>3</sub> H <sub>8</sub> | C <sub>2</sub> H <sub>2</sub> | C <sub>2</sub> H <sub>4</sub> | C <sub>2</sub> H <sub>6</sub> O (DME) | CH <sub>3</sub> OH                    | C <sub>2</sub> H <sub>5</sub> OH (Ethanol) | CH <sub>2</sub> O                          |
| BaTiO <sub>3</sub>               | CO | C <sub>2</sub> H <sub>6</sub> | C <sub>2</sub> H <sub>2</sub> | H <sub>2</sub>                | C <sub>3</sub> H <sub>8</sub> | C <sub>2</sub> H <sub>4</sub> | C <sub>2</sub> H <sub>6</sub> O (DME) | CH <sub>2</sub> O                     | CH <sub>3</sub> OH                         | C <sub>2</sub> H <sub>5</sub> OH (Ethanol) |

In the paper, we present the product fractions, since the yields and selectivities both have some terms that are subject to the gas expansion, which cannot be accounted for, due to the uncertainty on this gas expansion. However, for the sake of completeness, we also present

here both qualitative information on the order of the product yields (Table S.5), and quantitative data on the selectivities (

Table S.6).

The yields and selectivities are calculated with the following formulas, illustrated for H<sub>2</sub>.

$$Yield = [H_2]_{out} \quad (1)$$

$$Selectivity (\%) = \frac{2*[H_2]_{out}*100}{4*([CH_4]_{in}-[CH_4]_{out})} \quad (2)$$

**Table S.6: Product selectivities (%) for the different packing materials and sizes, and for the non-packed reactor. The highest selectivities for each component are highlighted.**

|                                  |            | CO | H <sub>2</sub> | C <sub>2</sub> H <sub>6</sub> | C <sub>2</sub> H <sub>4</sub> | C <sub>2</sub> H <sub>2</sub> | C <sub>3</sub> H <sub>8</sub> | C <sub>2</sub> H <sub>6</sub> O (DME) | C <sub>2</sub> H <sub>5</sub> OH (Ethanol) | CH <sub>2</sub> O | CH <sub>3</sub> O H |
|----------------------------------|------------|----|----------------|-------------------------------|-------------------------------|-------------------------------|-------------------------------|---------------------------------------|--------------------------------------------|-------------------|---------------------|
| Non-packed reactor               | 50 ml/min  | 31 | 4              | 15                            | 3                             | 4                             | 6.2                           | 0.2                                   | 0.2                                        | 0.1               | 0.1                 |
|                                  | 192 ml/min | 26 | 4              | 23                            | 3                             | 6                             | 5.9                           | 0.7                                   | 0.3                                        | 0.8               | 0.1                 |
|                                  |            |    |                |                               |                               |                               |                               |                                       |                                            |                   |                     |
| ZrO <sub>2</sub>                 | 1.25-1.4   | 30 | 6              | 12                            | 2                             | 12                            | 4.4                           | 0.9                                   | 0.3                                        | 0.4               | 0.2                 |
|                                  | 1.6-1.8    | 29 | 5              | 12                            | 1                             | 10                            | 4.4                           | 0.7                                   | 0.3                                        | 0.2               | 0.1                 |
|                                  | 2.0-2.24   | 29 | 4              | 11                            | 1                             | 8                             | 4.5                           | 0.5                                   | 0.3                                        | 0.1               | 0.1                 |
| SiO <sub>2</sub>                 | 1.25-1.4   | 22 | 5              | 11                            | 2                             | 18                            | 3.9                           | 0.9                                   | 0.2                                        | 0.6               | 0.1                 |
|                                  | 1.6-1.8    | 21 | 4              | 9                             | 2                             | 14                            | 4.0                           | 0.7                                   | 0.2                                        | 0.2               | 0.1                 |
|                                  | 2.0-2.24   | 22 | 4              | 10                            | 1                             | 10                            | 4.5                           | 0.5                                   | 0.2                                        | 0.2               | 0.1                 |
| α-Al <sub>2</sub> O <sub>3</sub> | 1.25-1.4   | 41 | 4              | 16                            | 1                             | 3                             | 5.0                           | 0.6                                   | 0.3                                        | 0.2               | 0.2                 |
|                                  | 1.6-1.8    | 38 | 4              | 15                            | 1                             | 3                             | 4.4                           | 0.4                                   | 0.3                                        | 0.2               | 0.2                 |
|                                  | 2.0-2.24   | 39 | 4              | 14                            | 1                             | 2                             | 4.6                           | 0.4                                   | 0.3                                        | 0.2               | 0.2                 |
| BaTiO <sub>3</sub>               | 1.25-1.4   | 26 | 4              | 11                            | 2                             | 14                            | 3.6                           | 1.6                                   | 0.4                                        | 0.6               | 0.4                 |
|                                  | 1.6-1.8    | 32 | 5              | 13                            | 2                             | 12                            | 4.0                           | 1.3                                   | 0.4                                        | 0.5               | 0.4                 |
|                                  | 2.0-2.24   | 34 | 5              | 15                            | 2                             | 10                            | 4.5                           | 0.9                                   | 0.4                                        | 0.3               | 0.3                 |
|                                  |            |    |                |                               |                               |                               |                               |                                       |                                            |                   |                     |
| γ-Al <sub>2</sub> O <sub>3</sub> | 2.0-2.24   | 36 | 4              | 16                            | 1                             | 2                             | 4.6                           | 0.4                                   | 0.0                                        | 0.0               | 0.0                 |

## 7. REACTION SCHEMES FROM LITERATURE (DISCUSSION)

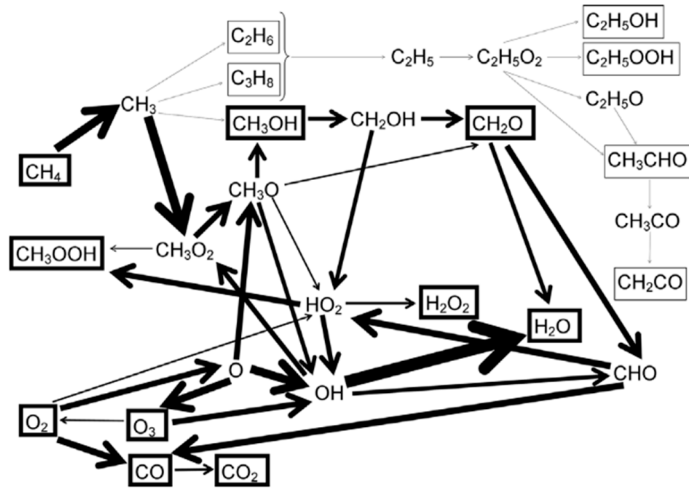

Figure S.34: Reaction scheme to illustrate the main pathways for the conversions of CH<sub>4</sub> and O<sub>2</sub> and their interactions. Adopted with permission from ref. [17]. Copyright 2018 American Chemical Society

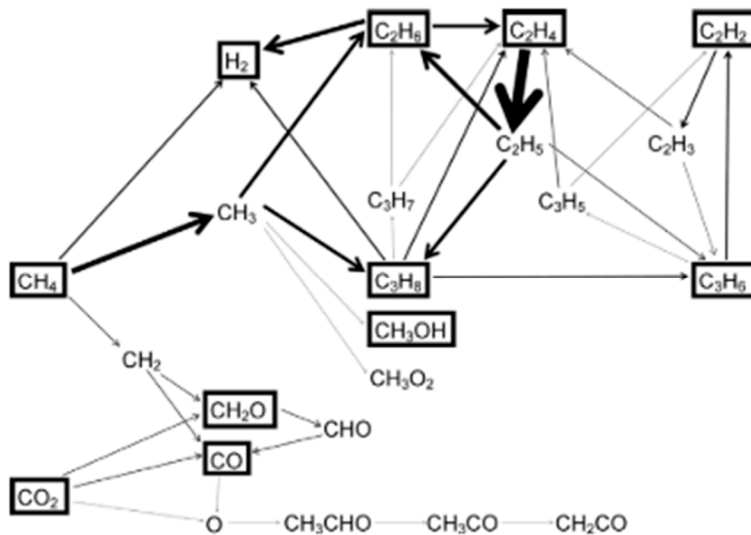

Figure S.35: Reaction scheme to illustrate the main pathways for dry reforming of methane. Adopted with permission from ref. [17]. Copyright 2018 American Chemical Society

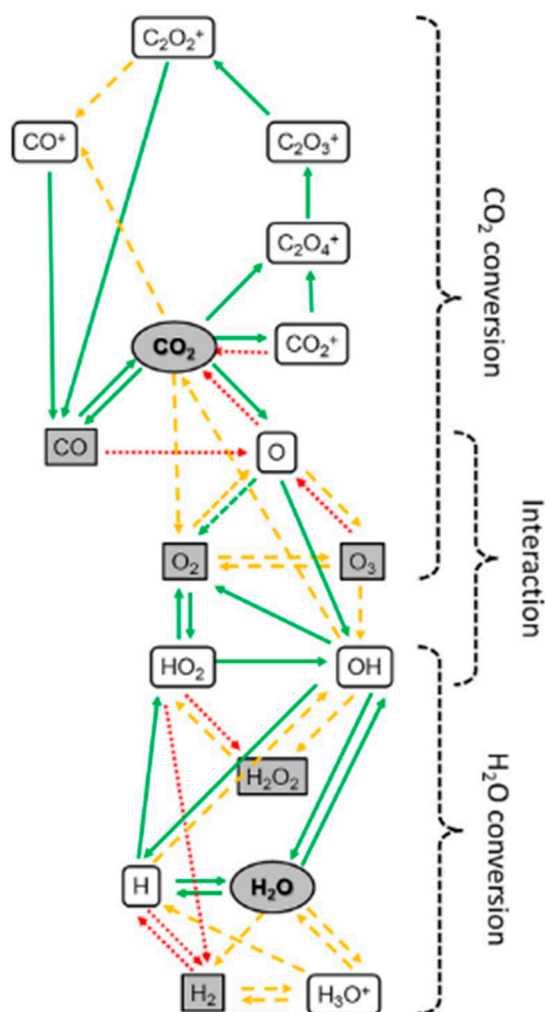

Figure S.36: Reaction scheme to illustrate the main pathways for the conversions of  $\text{CO}_2$  and  $\text{H}_2\text{O}$  and their interactions. Adopted with permission from ref. [18]. Copyright 2018 Wiley-VCH

## 8. REFERENCES

1. Tojo, T.; Atake, T.; Mori, T.; Yamamura, H. Heat capacity and thermodynamic functions of zirconia and yttria-stabilized zirconia. *J. Chem. Thermodyn.* **1999**, *31*, 831–845.
2. Takahashi, Y.; Yokokawa, H.; Kadokura, H.; Sekine, Y.; Mukaibo, T. Laser-flash calorimetry I. Calibration and test on alumina heat capacity. *J. Chem. Thermodyn.* **1979**, *11*, 379–394.
3. Chase, M.W.J. *NIST-JANAF Thermochemical Tables*, *J. Phys. Chem. Ref. Data*; 4th editio.; 1998;
4. He, Y. Heat capacity, thermal conductivity, and thermal expansion of barium titanate-based ceramics. *Thermochim. Acta* **2004**, *419*, 135–141.
5. Martienssen, W.; Warlimont, H. *Condensed matter and materials data*; 2005; ISBN 3-540-44376-2.
6. Zirconia -  $\text{ZrO}_2$ , Zirconium Dioxide Available online: <https://www.azom.com/properties.aspx?ArticleID=133>.
7. Alumina - Aluminium Oxide -  $\text{Al}_2\text{O}_3$  - A Refractory Ceramic Oxide Available online: <https://www.azom.com/article.aspx?ArticleID=52>.
8. Silica - Silicon Dioxide ( $\text{SiO}_2$ ) Available online: <https://www.azom.com/properties.aspx?ArticleID=1114>.
9. Butterworth, T.D. *The Effects of Particle Size on  $\text{CO}_2$  reduction in Packed Bed Dielectric Barrier Discharge Plasma Reactors*, 2015.

10. Lide, D.R. CRC Handbook of Chemistry and Physics. *J. Am. Chem. Soc.* **2009**, *131*, 12862–12862.
11. Michielsen, I.; Uytendhouwen, Y.; Pype, J.; Michielsen, B.; Mertens, J.; Reniers, F.; Meynen, V.; Bogaerts, A. CO<sub>2</sub> dissociation in a packed bed DBD reactor: First steps towards a better understanding of plasma catalysis. *Chem. Eng. J.* **2017**, *326*, 477–488.
12. Piskunov, S.; Heifets, E.; Eglitis, R.; Borstel, G. Bulk properties and electronic structure of SrTiO<sub>3</sub>, BaTiO<sub>3</sub>, PbTiO<sub>3</sub> perovskites: an ab initio HF/DFT study. *Comput. Mater. Sci.* **2004**, *29*, 165–178.
13. Chibisov, A.N. Effect of stoichiometry on the atomic and electronic structure of BaTiO<sub>3</sub> nanoparticles: A first-principles study. *Mol. Phys.* **2015**, *113*, 3291–3295.
14. Ramakanth, S.; James Raju, K.C. Band gap narrowing in BaTiO<sub>3</sub> nanoparticles facilitated by multiple mechanisms. *J. Appl. Phys.* **2014**, *115*, 173507.
15. Ahmed, R.; Sinnathambi, C.M.; Subbarao, D. Kinetics of de-coking of spent reforming catalyst. *J. Appl. Sci.* **2011**, *11*, 1225–1230.
16. Neyts, E.C.; Bogaerts, A. Understanding plasma catalysis through modelling and simulation—a review. *J. Phys. D. Appl. Phys.* **2014**, *47*, 224010.
17. De Bie, C.; Van Dijk, J.; Bogaerts, A. The Dominant Pathways for the Conversion of Methane into Oxygenates and Syngas in an Atmospheric Pressure Dielectric Barrier Discharge. *J. Phys. Chem. C* **2015**, *119*, 22331–22350.
18. Snoeckx, R.; Ozkan, A.; Reniers, F.; Bogaerts, A. The Quest for Value-Added Products from Carbon Dioxide and Water in a Dielectric Barrier Discharge: A Chemical Kinetics Study. *ChemSusChem* **2017**, *10*, 409–424.
